# Supplementary material
Source: PubMed Central journal article supplement (PMC7111323)
Supplement: mmc1.pdf [file mmc1.pdf]

**Cell, Volume 165**

## **Supplemental Information**

### **Structural Insights into the Niemann-Pick**

#### **C1 (NPC1)-Mediated Cholesterol**

#### **Transfer and Ebola Infection**

**Xin Gong, Hongwu Qian, Xinhui Zhou, Jianping Wu, Tao Wan, Pingping Cao, Weiyun Huang, Xin Zhao, Xudong Wang, Peiyi Wang, Yi Shi, George F. Gao, Qiang Zhou, and Nieng Yan**

## **Supplemental Experimental Procedures**

### **Expression and purification of the human NPC1 (hNPC1) and NPC2 (hNPC2)**

The complementary DNAs of full-length hNPC1 and hNPC2 were each subcloned into the pCAG vector. A C-terminal His<sub>10</sub> tag was fused for hNPC1 and a C-terminal FLAG plus His<sub>10</sub> tag (for ITC) or FLAG tag (for transfer assay) was used for hNPC2. HEK 293F cells (Invitrogen) were cultured in SMM 293T-I medium (Sino Biological Inc.) at 37 °C under 5% CO<sub>2</sub> in a Multitron-Pro shaker (Infors, 130 rpm). When the cell density reached 2.0×10<sup>6</sup> cells per ml, the cells were transiently transfected with the expression plasmids and polyethylenimines (PEIs) (Polysciences). Approximately 1 mg plasmids were pre-mixed with 3 mg PEIs in 50 ml fresh medium for 15-30 min before transfection. For transfection, 50 ml mixture was added to one liter cell culture and incubated for 30 min. Transfected cells were cultured for 48 h before harvesting.

For purification of hNPC1, the cells were collected and resuspended in the buffer containing 25 mM Tris pH 8.0, 150 mM NaCl and protease inhibitor cocktails (Amresco). After sonication on ice, the membrane fraction was solubilized at 4 °C for 2 hours with 1% (w/v) digitonin (Sigma). After centrifugation at 25,000 g for 45 min, the supernatant was collected and incubated with nickel affinity resin (Ni-NTA, Qiagen) at 4 °C for 30 min. The resin was rinsed with the wash buffer containing 25 mM Tris pH 8.0, 150 mM NaCl, 30 mM imidazole, 0.1% digitonin (w/v), and protease inhibitors. The protein was eluted from the affinity resin with the wash buffer plus 250 mM imidazole. The eluent was concentrated and applied to size exclusion chromatography (SEC, Superose 6, 10/300, GE Healthcare) in the buffer containing 25 mM Tris pH 8.0, 150 mM NaCl and 0.1% digitonin. The peak fractions were pooled and concentrated for EM analysis. The hNPC1

WT and variant proteins used for ITC or SPR were purified similarly, except that digitonin were replaced by 1% LMNG (w/v) or 0.02% C12E8 (w/v) in the extraction and purification procedure, respectively.

For purification of hNPC2, the secreted protein were collected and concentrated in the buffer containing 25 mM MES pH 6.0 and 150 mM NaCl. After centrifugation at 25,000 g for 10 min, the supernatant was collected and loaded to nickel affinity resin (Ni-NTA, Qiagen) at 4 °C. The resin was washed by the buffer containing 25 mM MES pH 6.0, 150 mM NaCl and 30 mM imidazole. The protein was eluted from the affinity resin with the wash buffer plus 250 mM imidazole. The eluent was concentrated and applied to SEC (Superose 6, 10/300, GE Healthcare) in the buffer containing 25 mM MES pH 6.0, 150 mM NaCl, 0.02% C12E8 (w/v) and 0.1 mM *tris*(2-carboxyethyl)phosphine (TCEP). The peak fractions were pooled and concentrated for ITC titration. The hNPC2 protein used for cholesterol transfer assay was purified similarly, except that the SEC buffer contained 25 mM MES pH 5.5, and 150 mM NaCl.

The protocol for expression, purification and processing of the glycoprotein of Ebola virus (EBOV-GPcl) was identical to that reported (Wang et al., 2016).

### **Isothermal titration calorimetry (ITC)**

The binding affinities between hNPC2 and the indicated hNPC1 variants were measured using ITC. All the proteins were purified to homogeneity in the buffer containing 25 mM MES (pH 6.0) or 25 mM HEPES (pH 7.5), 150 mM NaCl, 0.02% C<sub>12</sub>E<sub>8</sub> (w/v) and 0.1 mM TCEP. For each injection, 2 µl hNPC2 with a concentration of approximately 300 µM was titrated into hNPC1 in the chamber. Various concentrations of the hNPC1

variants were tested and the optimal concentrations were used: WT, R518W, and  $\Delta$ NTD at  $\sim 1 \mu\text{M}$ , L175A/L176A and Q88A/Q92A/R96A at  $\sim 5 \mu\text{M}$ , and  $\Delta$ linker at  $\sim 10 \mu\text{M}$ .

Multiple concentrations of NTD were tested, but none gave rise to a characteristic pattern that could be fitted. Shown in Figure S4D was the titration with  $1 \mu\text{M}$  NTD. All experiments were performed with a VP-ITC microcalorimeter (MicroCal iTC200) at  $18^\circ\text{C}$ . The data were fitted using the software ORIGIN 7.0 (Origin Lab).

### **[ $^3\text{H}$ ]-cholesterol transfer assay**

For preparation of the [ $^3\text{H}$ ]-cholesterol bound hNPC2,  $300 \mu\text{l}$  buffer A (25 mM MES, pH 5.5, and 150 mM NaCl) containing approximately 500 nM [ $^3\text{H}$ ]-cholesterol (108.78 dpm/fmol; delivered in ethanol at final concentration of 3%) was mixed with approximately  $80 \mu\text{g}$  FLAG-tagged hNPC2. After incubation for about 3 hr at room temperature, the mixture was diluted with  $700 \mu\text{l}$  buffer A. After centrifugation at  $15000 \text{g}$  for 20 min, the suspension was applied to FLAG M2 affinity column. After washing with 4 ml cold buffer A, the [ $^3\text{H}$ ]-cholesterol-loaded protein was eluted with 1 ml cold buffer A plus 0.3 mg/ml FLAG peptide. The eluent containing [ $^3\text{H}$ ]-cholesterol-bound hNPC2 was aliquoted and used for transfer assay immediately.

For transfer assay, His<sub>10</sub>-tagged hNPC1 variants were prepared in  $125 \mu\text{l}$  buffer containing buffer A plus 0.06% digitonin and mixed with  $25 \mu\text{l}$  aforementioned hNPC2 eluent (with about 0.7 pmol [ $^3\text{H}$ ]-cholesterol as measured by scintillation counting). After incubation at  $4^\circ\text{C}$  for 30 min, each reaction was diluted with  $875 \mu\text{l}$  cold buffer B (250 mM HEPES 7.5, 150 mM NaCl and 0.06% digitonin) before immediately loading to Ni-NTA column. After washing with 3 ml cold buffer C (25 mM HEPES 7.5, 150 mM

NaCl and 0.06% digitonin), the protein was eluted with 1 ml buffer C plus 250 mM imidazole. The amount of [<sup>3</sup>H]-cholesterol in the eluent was quantified by scintillation counting. The transfer assay at pH 7.5 was carried out similarly expect that the pH of buffer A was adjusted to 7.5 with 100 mM HEPES. Each data point is the average of triple assays. Error bars represent SD.

### **Surface plasmon resonance (SPR)**

The SPR experiments were performed using a Biacore<sup>®</sup> 3000 system at 25 °C with a flow rate of 30 µl/min in buffer A (50 mM MES, pH 6.0, 150 mM NaCl, 0.02% C12E8) or buffer B (10 mM Hepes, pH 7.5, 150 mM NaCl, 0.02% C12E8). The purified proteins for SPR analysis were changed into buffer A or buffer B through SEC. For SPR measurement at pH 6.0, GPcl was covalently coupled to a CM5 sensor chip with about 2000 response units, and a series of concentrations of the hNPC1 variants were flowed over the GPcl chip surface. For measurement at pH 7.5, NPC1 was covalently coupled to a CM5 sensor chip, and different concentrations of GPcl were flowed over the NPC1 chip surface. The binding kinetics was analyzed using the software BIAevaluation Version 4.1.

### **Cryo-EM data collection and processing of the complex between FL hNPC1 and EBOV-GPcl (the NPC1-GPcl complex)**

The NPC1-GPcl complex (approximately 15 mg/ml) was reconstituted by incubating the purified NPC1 and GPcl at a mass ratio of approximately 0.6:1 at 4 °C for 5h. The procedure for cryo-EM sample preparation and data collection of the NPC1-GPcl

complex was nearly identical to that for NPC1. To be brief, a total of 1,379 micrographs of NPC1-GPcl complex were collected, from which 703,336 particles were automatically picked with RELION 1.4. After several rounds of 2D classification, a total of 391,702 particles were selected and 3D classified into 4 classes. One class that showed distinct features of the NPC1-GPcl complex was further 3D classified into 6 classes. Classes displaying similar features were combined, resulting in 3 classes based on the density of GPcl and hNPC1(NTD). The first and second classes have both NPC1 and GPcl, which were invisible at higher threshold in the third class. Among the first two classes, the NTD was invisible at a higher threshold in the second class. The first class was further subjected to 3D auto-refinement with RELION 1.4. The final particle number used was 50,223.

### **Model building and refinement**

Please refer to Experimental Procedures for cryo-EM data acquisition and processing of hNPC1. The Class 1 map of hNPC1 at 4.4 Å was used for model building. The crystal structures of domain C (PDB: 5F1B, 5HNS) (Wang et al., 2016; Zhao et al., 2016) and NPC1(NTD) (PDB: 3GKI) (Kwon et al., 2009) were first docked into the corresponding map in Chimera (Pettersen et al., 2004). Thirteen transmembrane helices (TMs) were readily discernible in the transmembrane region, 12 of which can be fitted by a homologous crystal structure of AcrB (PDB: 1IWG) (Murakami et al., 2002). Since the 12 TMs exhibited a 2-fold pseudosymmetry, the AcrB crystal structure can be fitted into the transmembrane regions in two ways. The correct fitting was selected based on the connections between TMs and the extracellular domains. The remaining transmembrane

helix was TM1. Each TM was manually adjusted in COOT (Emsley et al., 2010) to better fit the EM map. After the assignment of NTD, domain C, and TMD, the remaining map in the extracellular region corresponded to domain I. The map of domain I resembles that of domain C, consistent with their 30% sequence similarity. The structure of domain I was manually built in COOT using domain C as a reference.

Since the overall resolution was insufficient for side chain assignment, the model was mostly built as poly Ala except for the directly docked NTD and domain C. Most of the predicted glycosylation sites can be observed in the EM maps of extracellular domains and 25 sugar molecules were built to 14 glycosylation sites. These glycosyl groups facilitated validation of model building. The structure was refined against the Class 1 map by PHENIX (Adams et al., 2010) in real space with secondary structure and geometry restraints.

For the NPC1-GPcl complex, the 4.4 Å cryo-EM structure of NPC1 and the crystal structure of an EBOV-GPcl trimer (PDB: 5F1B) were fitted into the EM map in Chimera. Model statistics can be found in Supplemental Tables 2 and 4.

**Supplemental Table 1 | Statistics of the removed and remaining NPC1 particle numbers during random-phase 3D classifications.** Related to Experimental Procedure.

| <b>NPC1 Classes</b> | <b>Datasets</b> | <b>Random-phase resolution, Å</b> | <b># of iteration</b> | <b>Binning factor</b> | <b># of remaining particles</b> | <b># of removed particles</b> |
|---------------------|-----------------|-----------------------------------|-----------------------|-----------------------|---------------------------------|-------------------------------|
| <b>Class 1</b>      | subset I        | 40                                | 33                    | 2                     | 103,751                         | 4,533                         |
|                     |                 | 30                                | 72                    | 2                     | 90,072                          | 13,679                        |
|                     |                 | 25                                | 89                    | 2                     | 81,548                          | 8,524                         |
|                     |                 | 25                                | 71                    | 1                     | 78,208                          | 3,340                         |
|                     |                 | 20 <sup>a</sup>                   | 64                    | 1                     | 70,573                          | 5,663                         |
|                     |                 | 16                                | 50                    | 1                     | 66,245                          | 4,328                         |
|                     |                 | 14                                | 42                    | 1                     | 64,188                          | 2,057                         |
|                     |                 | 12                                | 33                    | 1                     | 60,977                          | 3,211                         |
|                     |                 | 11                                | 63                    | 1                     | 57,062                          | 3,915                         |
|                     |                 | 10                                | 29                    | 1                     | 52,976                          | 4,086                         |
| <b>Class 1</b>      | subset II       | 40                                | 32                    | 2                     | 150,524                         | 11,245                        |
|                     |                 | 30                                | 31                    | 2                     | 144,778                         | 5,746                         |
|                     |                 | 25                                | 33                    | 2                     | 139,447                         | 5,331                         |
|                     |                 | 20 <sup>b</sup>                   | 78                    | 2                     | 80,091                          | 20,412                        |
|                     |                 | 25                                | 63                    | 1                     | 69,108                          | 10,983                        |
|                     |                 | 20                                | 75                    | 1                     | 67,204                          | 1,904                         |
| <b>Class 1</b>      | Subsets I & II  | 25 <sup>c</sup>                   | 77                    | 1                     | 114,403                         | 5,777                         |
|                     |                 | 20                                | 98                    | 1                     | 109,947                         | 4,456                         |
|                     |                 | 15                                | 53                    | 1                     | 102,731                         | 7,216                         |
| <b>Class 2</b>      | subset I        | 40                                | 33                    | 2                     | 119,504                         | 7,435                         |
|                     |                 | 30                                | 62                    | 2                     | 105,057                         | 14,447                        |
|                     |                 | 25                                | 91                    | 2                     | 93,620                          | 11,437                        |

<sup>a</sup>, The particles were re-3D classified before this cycle; <sup>b</sup>, A total of 38,944 particles were removed through 2D classification before this cycle; <sup>c</sup>, The dataset was obtained by combining the subsets I and II.



**Supplemental Table 2 | Summary of data collection and model statistics of EM reconstructions of hNPC1.** Related to Figure 1.

| <b>Data collection</b>                          |                   |         |
|-------------------------------------------------|-------------------|---------|
| EM equipment                                    | FEI Titan Krios   |         |
| Voltage (kV)                                    | 300               |         |
| Detector                                        | K2 Summit (Gatan) |         |
| Pixel size (Å)                                  | 1.307             |         |
| Electron dose (e <sup>-</sup> /Å <sup>2</sup> ) | 50                |         |
| Defocus range (µm)                              | 1.5-3.0           |         |
| <b>Reconstruction</b>                           |                   |         |
| Software                                        | RELION 1.4        |         |
| Maps                                            | Class 1           | Class 2 |
| Number of used Particles                        | 102,731           | 93,620  |
| Symmetry                                        | C1                |         |
| Final Resolution (Å)                            | 4.4               | 6.7     |
| <b>Model building</b>                           |                   |         |
| Software                                        | COOT              |         |
| <b>Refinement</b>                               |                   |         |
| Software                                        | Phenix            |         |
| <b>Docking correlation coefficient</b>          |                   |         |
| Domain A                                        | 0.863             |         |
| Domain C                                        | 0.828             |         |
| AcrB_TMD                                        | 0.745             |         |
| NPC1_TMD                                        | 0.884             |         |
| Domain I                                        | 0.850             |         |
| <b>Model composition</b>                        |                   |         |
| Protein residues                                | 1,139             |         |
| Sugar                                           | 25                |         |
| <b>Validation</b>                               |                   |         |
| R.m.s deviations                                |                   |         |
| Bonds length (Å)                                | 0.005             |         |
| Bonds Angle (°)                                 | 0.802             |         |
| Ramachandran plot statistics (%)                |                   |         |
| Preferred                                       | 90.6              |         |
| Allowed                                         | 7.5               |         |
| Outlier                                         | 1.9               |         |

**Supplemental Table 3 | Summary of Niemann-Pick disease type C-related sequence variations of hNPC1.** Related to Figure 3.

| NTD   | Domain C | Domain I |                | TMD   |        |
|-------|----------|----------|----------------|-------|--------|
| C63R  | V378A    | Q862L    | NITDQF961-966S | M272R | Y825C  |
| C74Y  | L380F    | S865L    | N961S          | W273S | S849I  |
| Q92R  | A388P    | Y871C    | N968S          | R372W | I1094T |
| C113R | R389C    | D874V    | C976R          | M631R | D1097N |
| T137M | P401T    | P888S    | R978C          | G640R | N1137I |
| P166S | R404P    | V889M    | G986S          | S652W | G1140V |
| C177G | R404Q    | Y890C    | G992A          | G660S | M1142T |
| C177Y | R404W    | Y899D    | G992R          | V664M | N1150K |
| N222S | P433L    | G910S    | G992W          | S666N | N1156I |
| V231G | P434L    | D917Y    | M996R          | C670W | N1156S |
| P237S | E451K    | A926T    | S1004L         | G673V | V1165M |
| D242H | S473P    | A927V    | P1007A         | L684F | F1167L |
| D242N | P474L    | Q928P    | G1012D         | P691L | C1168Y |
| C247Y | C479Y    | L929P    | G1015V         | L695V | A1174V |
| G248V | Y509S    | R934Q    | H1016R         | D700N | R1186H |
|       | H510P    | S940L    | V1023G         | F703S | E1189G |
|       | H512R    | W942C    | G1034R         | L724P | T1205K |
|       | R518Q    | I943M    | A1035V         | V727F | T1205R |
|       | R518W    | D944N    | T1036K         | S734I | V1212L |
|       | A521S    | D945N    | T1036M         | E742K | L1213F |
|       | F537L    | D948H    | A1054T         | A745E | L1213V |
|       | P543L    | D948N    | R1059Q         | M754K | A1216V |
|       | T574K    | D948Y    | I1061T         | F763L | F1224L |
|       | K576R    | V950M    | A1062V         | A767V | G1236E |
|       | A605V    | S954L    | T1066N         | Q775P | G1240R |
|       | E612D    | C956Y    | F1087L         | R789C | S1249G |
|       | R615C    | R958L    | Y1088C         | R789G |        |
|       | R615L    | R958Q    | E1089K         |       |        |
|       |          | V959E    |                |       |        |

The mutations were extracted from a review (Scott and Ioannou, 2004) and the UNIPROT website: <http://www.uniprot.org/uniprot/O15118>

**Supplemental Table 4 | Summary of data collection and model statistics for the cryo-EM reconstruction of the complex between hNPC1 and EBOV-GPcl. Related to Figure 6.**

---

|                                                 |                   |
|-------------------------------------------------|-------------------|
| <b>Data collection</b>                          |                   |
| EM equipment                                    | FEI Titan Krios   |
| Voltage (kV)                                    | 300               |
| Detector                                        | K2 Summit (Gatan) |
| Pixel size (Å)                                  | 1.307             |
| Electron dose (e <sup>-</sup> /Å <sup>2</sup> ) | 50                |
| Defocus range (µm)                              | 1.7-2.7           |
| <b>Reconstruction</b>                           |                   |
| Software                                        | RELION 1.4        |
| Number of used Particles                        | 50,223            |
| Symmetry                                        | C1                |
| Final Resolution (Å)                            | 6.6               |
| <b>Model Docking</b>                            |                   |
| Software                                        | Chimera           |
| <b>Docking correlation coefficient</b>          |                   |
| GP_trimer                                       | 0.864             |
| hNPC1                                           | 0.844             |

---

**Supplemental References:**

- Adams, P.D., Afonine, P.V., Bunkoczi, G., Chen, V.B., Davis, I.W., Echols, N., Headd, J.J., Hung, L.W., Kapral, G.J., Grosse-Kunstleve, R.W., *et al.* (2010). PHENIX: a comprehensive Python-based system for macromolecular structure solution. *Acta Crystallogr D* *66*, 213-221.
- Emsley, P., Lohkamp, B., Scott, W.G., and Cowtan, K. (2010). Features and development of Coot. *Acta Crystallogr D* *66*, 486-501.
- Kwon, H.J., Abi-Mosleh, L., Wang, M.L., Deisenhofer, J., Goldstein, J.L., Brown, M.S., and Infante, R.E. (2009). Structure of N-terminal domain of NPC1 reveals distinct subdomains for binding and transfer of cholesterol. *Cell* *137*, 1213-1224.
- Murakami, S., Nakashima, R., Yamashita, E., and Yamaguchi, A. (2002). Crystal structure of bacterial multidrug efflux transporter AcrB. *Nature* *419*, 587-593.
- Pettersen, E.F., Goddard, T.D., Huang, C.C., Couch, G.S., Greenblatt, D.M., Meng, E.C., and Ferrin, T.E. (2004). UCSF chimera - A visualization system for exploratory research and analysis. *J Comput Chem* *25*, 1605-1612.
- Scott, C., and Ioannou, Y.A. (2004). The NPC1 protein: structure implies function. *Biochimica et Biophysica Acta (BBA) - Molecular and Cell Biology of Lipids* *1685*, 8-13.
- Wang, H., Shi, Y., Song, J., Qi, J.X., Lu, G.W., Yan, J.H., and Gao, G.F. (2016). Ebola Viral Glycoprotein Bound to Its Endosomal Receptor Niemann-Pick C1. *Cell* *164*, 258-268.
- Zhao, Y., Ren, J., Harlos, K., and Stuart, D.I. (2016). Structure of glycosylated NPC1 luminal domain C reveals insights into NPC2 and Ebola virus interactions. *FEBS letters*.
