# Supplementary material
Source: PubMed Central journal article supplement (PMC7111323)
Supplement: mmc2.pdf [file mmc2.pdf]

# Structural Insights into the Niemann-Pick C1 (NPC1)-Mediated Cholesterol Transfer and Ebola Infection

## Graphical Abstract

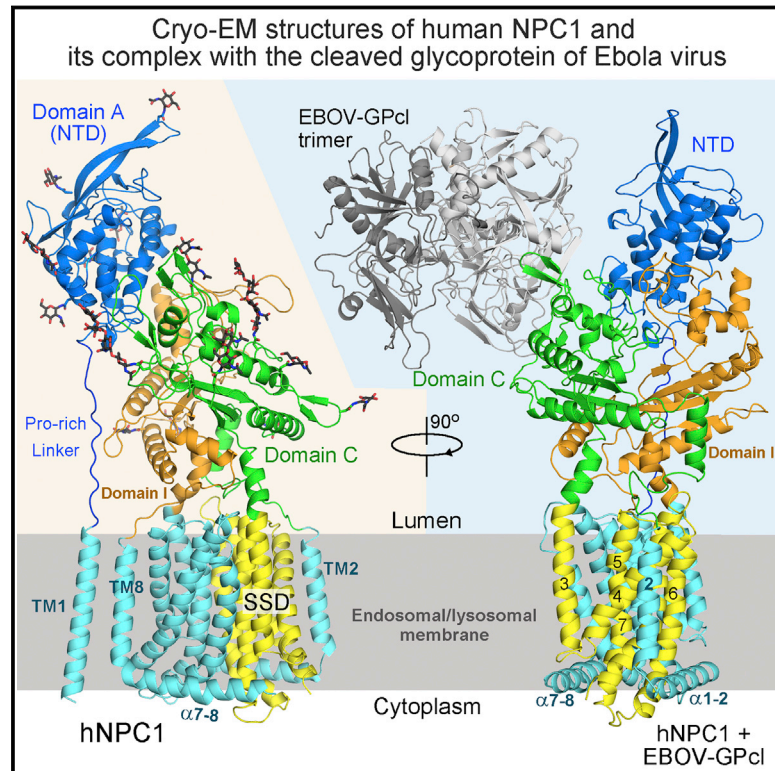

## Authors

Xin Gong, Hongwu Qian, Xinhui Zhou, ..., George F. Gao, Qiang Zhou, Nieng Yan

## Correspondence

zhouqiang00@tsinghua.org.cn (Q.Z.), nyan@tsinghua.edu.cn (N.Y.)

## In Brief

Cryo-EM structures of full-length human Niemann-Pick type C1, a lipid and cholesterol transporter involved in lysosomal storage disease, reveals insights into cholesterol trafficking and Ebola infection.

## Highlights

- The cryo-EM structure of full-length human NPC1 was determined at 4.4 Å resolution
- Structure-guided biochemical analysis of cholesterol transfer from NPC2 to NPC1
- Low-resolution cryo-EM structure of NPC1 bound to GPcl of Ebola virus was obtained
- A trimeric GPcl binds to one NPC1 through the crystal structure-revealed interface

## Accession Numbers

3JD8  
5JNX

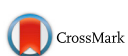

# Structural Insights into the Niemann-Pick C1 (NPC1)-Mediated Cholesterol Transfer and Ebola Infection

Xin Gong,<sup>1,2,3,7</sup> Hongwu Qian,<sup>1,2,3,7</sup> Xinhui Zhou,<sup>1,2,3,7</sup> Jianping Wu,<sup>1,2,3,7</sup> Tao Wan,<sup>4,7</sup> Pingping Cao,<sup>1,2,3</sup> Weiyun Huang,<sup>1,2,3</sup> Xin Zhao,<sup>1,2,3</sup> Xudong Wang,<sup>4</sup> Peiyi Wang,<sup>5</sup> Yi Shi,<sup>4,6</sup> George F. Gao,<sup>4,6</sup> Qiang Zhou,<sup>1,2,3,\*</sup> and Nieng Yan<sup>1,2,3,\*</sup>

<sup>1</sup>State Key Laboratory of Membrane Biology

<sup>2</sup>Beijing Advanced Innovation Center for Structural Biology

<sup>3</sup>Tsinghua-Peking Joint Center for Life Sciences

School of Life Sciences and School of Medicine, Tsinghua University, Beijing 100084, China

<sup>4</sup>CAS Key Laboratory of Pathogenic Microbiology and Immunology (CASPMI), Institute of Microbiology, Chinese Academy of Sciences, Beijing 100101, China

<sup>5</sup>Faculty of Biological Sciences, University of Leeds, Leeds LS2 9JT, UK

<sup>6</sup>Savaid Medical School, University of Chinese Academy of Sciences, Beijing 100049, China

<sup>7</sup>Co-first author

\*Correspondence: zhouqiang00@tsinghua.org.cn (Q.Z.), nyan@tsinghua.edu.cn (N.Y.)

<http://dx.doi.org/10.1016/j.cell.2016.05.022>

## SUMMARY

Niemann-Pick disease type C (NPC) is associated with mutations in *NPC1* and *NPC2*, whose gene products are key players in the endosomal/lysosomal egress of low-density lipoprotein-derived cholesterol. NPC1 is also the intracellular receptor for Ebola virus (EBOV). Here, we present a 4.4 Å structure of full-length human NPC1 and a low-resolution reconstruction of NPC1 in complex with the cleaved glycoprotein (GP<sub>cl</sub>) of EBOV, both determined by single-particle electron cryomicroscopy. NPC1 contains 13 transmembrane segments (TMs) and three distinct luminal domains A (also designated NTD), C, and I. TMs 2–13 exhibit a typical resistance-nodulation-cell division fold, among which TMs 3–7 constitute the sterol-sensing domain conserved in several proteins involved in cholesterol metabolism and signaling. A trimeric EBOV-GP<sub>cl</sub> binds to one NPC1 monomer through the domain C. Our structural and biochemical characterizations provide an important framework for mechanistic understanding of NPC1-mediated intracellular cholesterol trafficking and Ebola virus infection.

## INTRODUCTION

The Niemann-Pick type C (NPC) lysosomal storage disease is characterized by the accumulation of cholesterol, sphingomyelin, and other lipids in endosomes and lysosomes. NPC patients may develop progressive neurodegeneration, hepatosplenomegaly, and premature death (Vanier, 2010; Vanier and Millat, 2003). The disease is associated with *NPC1* and *NPC2* genes. *NPC1* encodes a polytopic membrane protein that is located in the membranes of endosomes and lysosomes, and NPC2 is a

small soluble protein in the lumen of endosomes and lysosomes or secreted from cell (Carstea et al., 1997; Loftus et al., 1997; Naureckiene et al., 2000). Genetic and biochemical characterizations revealed that NPC1 and NPC2 cooperate to export low density lipoprotein (LDL)-derived cholesterol from late endosomes and lysosomes to other cellular compartments (Infante et al., 2008; Sleat et al., 2004; Vanier, 2015).

The human NPC1 (hNPC1) consists of 1,278 amino acids (aa) and is comprised of 13 transmembrane helices (TM) and 3 distinct luminal domains A, C, and I (Davies and Ioannou, 2000). The amino terminal (N) domain A is also designated NPC1(NTD). The prevailing model suggests that cholesterol derived from endocytosed LDL is extracted by NPC2, which may be recruited to NPC1 by domain C and deliver the bound cholesterol to NPC1(NTD) through a “hydrophobic handoff” mechanism (Deffieu and Pfeffer, 2011; Kwon et al., 2009; Wang et al., 2010). The molecular basis for the ensuing intracellular trafficking of cholesterol remains largely elusive.

Sequence analysis suggested that NPC1 belongs to the resistance-nodulation-cell division (RND) superfamily (Davies et al., 2000; Scott and Ioannou, 2004; Tseng et al., 1999), whose members, exemplified by the bacterial multidrug resistance pump AcrB and MexB, generally catalyze substrate export in change of H<sup>+</sup> influx (Delmar et al., 2014; Venter et al., 2015; Yamaguchi et al., 2015). NPC1 was reported to be a lipid exporter (Davies et al., 2000). TMs 3–7 of NPC1 were predicted to constitute the sterol-sensing domain (SSD), which is also identified in several other cholesterol metabolism or signaling-related membrane proteins, including the SREBP cleavage activating protein (SCAP) (Hua et al., 1996), the 3-hydroxy-3-methylglutaryl-CoA reductase (HMGCR) (Luskey and Stevens, 1985), NPC1-Like 1 protein (NPC1L1) (Altmann et al., 2004), and the Hedgehog signaling pathway proteins Patched and Dispatched (Burke et al., 1999; Hooper and Scott, 1989; Nakano et al., 1989). The SSD acts as a regulatory domain in all these proteins (Doolman et al., 2004; Kuwabara and Labouesse, 2002; Malathi et al., 2004; Martín et al., 2001; Millard et al., 2005; Millat et al., 2001;

Nohturfft et al., 1998; Strutt et al., 2001; Yabe et al., 2002). Mutations in NPC1-SSD eliminated binding with a photoactivatable cholesterol analog and failed to crosslink with a small compound inhibitor for cholesterol egress (Lu et al., 2015; Ohgami et al., 2004). The structure and functional mechanism of SSDs remain unclear.

In addition to cholesterol egress, NPC1 also serves as a critical component for cellular entry of Ebola virus (Carette et al., 2011; Côté et al., 2011). The surface glycoprotein GP of the endocytotic viruses undergoes proteolytic cleavage by cathepsin (Chandran et al., 2005; Schornberg et al., 2006). Binding of the cleaved GP (GPcl) to NPC1 through domain C is required for the subsequent release of the viral contents to the infected cells (Miller et al., 2012).

The crystal structures of individual NTD, domain C, NTD bound to sterols, and domain C in complex with GPcl of Ebola (EBOV-GPcl) were determined (Kwon et al., 2009; Wang et al., 2016; Zhao et al., 2016). However, the structure of the transmembrane domain and how the distinct domains are organized remain to be elucidated. Here, we report the 4.4 Å structure of full-length (FL) hNPC1 and a 6.6 Å reconstruction of hNPC1 in complex with EBOV-GPcl, both determined using single particle electron cryomicroscopy (cryo-EM).

## RESULTS

### Structural Determination of hNPC1

The details of recombinant expression, purification, and cryo-EM image acquisition of hNPC1 can be found in the [Supplemental Experimental Procedures](#). The mature hNPC1 contains 1,254 aa after removal of the signal peptide. The protein appears to be a monomer when extracted and purified in the presence of digitonin (Figure 1A). The small size of the protein represented a major challenge for structural analysis using cryo-EM. We developed a “random-phase 3D classification” method, which effectively eliminated “bad” particles (Table S1). Eventually, two maps were obtained, one at 4.4 Å out of 102,731 selected particles and the other at 6.6 Å out of 93,620 particles according to the gold-standard Fourier shell correlation (FSC) 0.143 criterion (Figure S1 and Table S2). We will mainly focus on the 4.4 Å reconstruction for structural analysis (Figure 1B).

The overall structure, which is ~140 Å high, contains a bulky luminal region and a distinctive transmembrane domain (TMD) (Figure 1B). The reported crystal structures of NTD (Kwon et al., 2009), domain C (Wang et al., 2016; Zhao et al., 2016) and several bacterial RND members (Long et al., 2010; Murakami et al., 2002; Pak et al., 2013; Sennhauser et al., 2009) tremendously facilitated model building of hNPC1 at this modest resolution (Figures 1C and S2). The RND fold was readily discernible, leaving TM1 as a lone helix adjacent to TM8. A poly-Ala model was generated for the TMD, which is ~40 Å high, 70 Å long, and 45 Å thick (Figures 1B and S3A).

The crystal structures of NTD and domain C (PDB: 3GKJ and PDB: 5HNS, respectively) were docked to the corresponding map with manual adjustment. The map of domain I resembles that of domain C, consistent with their 30% sequence similarity (Figures S2A and S2B). A homologous model of domain I was generated and docked into the map. 14 glycosylation sites

were identified, 5 on NTD, 7 on domain C, and 2 on domain I. These glycosylation sites in turn validated sequence assignment (Figures 1C and S3B and Table S2).

### The SSD-Containing TMD of hNPC1

TM2 and TM8 are each preceded by a long helix that attaches to the cytoplasmic membrane surface (Figure 2A, left). The two transverse helices, designated  $\alpha$ 1-2 and  $\alpha$ 7-8, are almost parallel to each other and embrace TMs 2–13 on the cytoplasmic side (Figure 2A, middle). As observed in all the RND members of known structures (Long et al., 2010; Murakami et al., 2002; Pak et al., 2013; Sennhauser et al., 2009), the first six TMs (TMs 2–7 in hNPC1) are related to the C-terminal six TMs by 180-degree rotation around an axis that is perpendicular to the membrane plane (Figure 2A, right).

The two repeats interact with each other through an extensive interface involving TMs 3/5/6/7 in the first repeat and the corresponding TMs 9/11/12/13 in the second one (Figure 2A). Notably, TMs 3–7 constitute the SSD (Davies and Ioannou, 2000) (Figure 2B). The lack of side chains precludes analysis of this regulatory domain in detail. Nevertheless, the structure shows that all the five SSD-forming TMs are exposed to the lipid bilayer to different extent, making SSD available for potential interactions with membrane-embedded sterols or other integral membrane proteins. The structural fold of SSD is likely preserved in all the other SSD-containing proteins (Figure S3C).

TMs 3–7 share 15% sequence identity and 43% similarity with TMs 9–13, suggesting that the latter is a SSD-like domain (Figures 2A and S3D). In essence, the interface between the two internal repeats is mediated through two SSDs (Figure 2A, middle). Notably, Patched and Dispatched were both predicted to be RND members comprising 12 TMs with internal 2-fold pseudosymmetry (Taipale et al., 2002; Tseng et al., 1999). These two proteins likely have the same TMD organization as NPC1. On the other hand, SCAP and HMGCR each contain 8 TMs, excluding the possibility of a second SSD or SSD-like domain. Nevertheless, the TMD of SCAP was shown to tetramerize (Radhakrishnan et al., 2004), and the catalytic domain of HMGCR also exists as a tetramer (Istvan et al., 2000). It remains to be investigated whether SSD in these two proteins are responsible for homotypic interactions.

The TMDs of hNPC1 and AcrB can be well superimposed (Figure 2C, left). AcrB and other bacterial RND members of known structures are all trimers, whereas hNPC1 is a monomer. When the structural comparison is carried out in the context of the trimer, none of the SSD-corresponding TMs in AcrB participate in trimerization. As in the monomeric hNPC1, the SSD-corresponding TMs in the trimeric AcrB are laterally exposed to the lipid bilayer (Figure 2C, right).

### Organization of the Luminal Domains

The three luminal domains, which are separated in the primary sequence, interact with each other. The overall height of the luminal region is ~100 Å, allowing the NTD to potentially protrude above the glycocalyx (Neiss, 1984). As predicted, the NTD is connected to the lone TM1 through an elongated Pro-rich segment <sup>249</sup>PKPQPPPPPPAP<sub>259</sub> (Figure 3A) (Kwon et al., 2009). In the absence of NTD and TM1, the rest of the structure

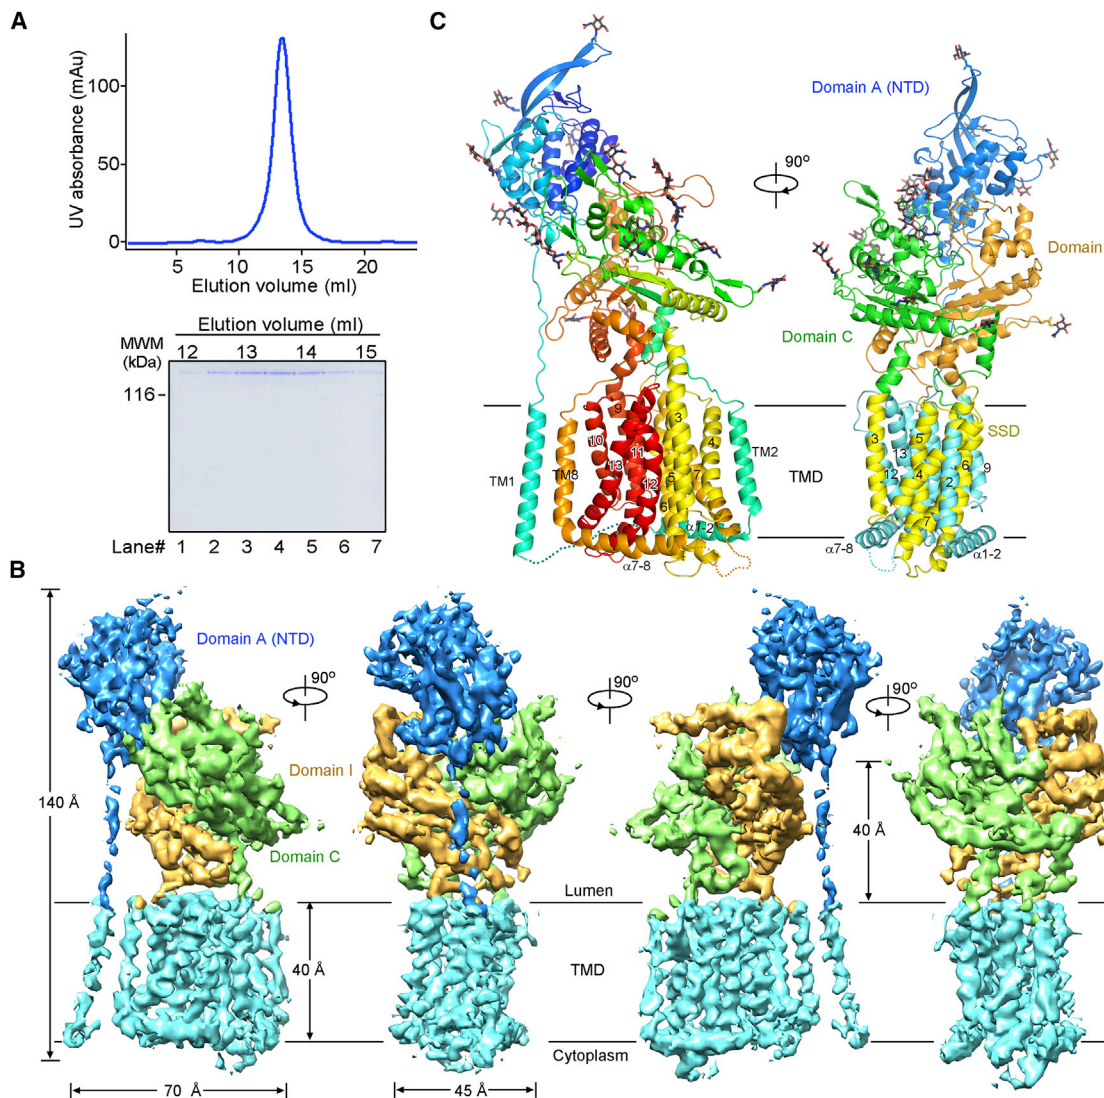

**Figure 1. Overall Architecture of the Human NPC1**

(A) The last step purification of full-length hNPC1 through size exclusion chromatography. The indicated fractions were applied to SDS-PAGE and visualized by Coomassie blue staining.

(B) The EM map of hNPC1 reconstructed at 4.4 Å resolution. The domain-colored maps were generated in Chimera (Pettersen et al., 2004). Unless otherwise indicated, the same domain color scheme is applied to all figures.

(C) The structural model of hNPC1. The structure on the left is rainbow colored with the amino and carboxyl termini colored blue and red, respectively. The invisible cytoplasmic segments connecting TM1 and  $\alpha$ 1-2 and between TM7 and  $\alpha$ 7-8 are indicated by dotted lines. The structure on the right is domain colored. The glycosyl groups are shown as black sticks. All structure figures were prepared with PyMol (DeLano, 2002).

appears to have a 2-fold pseudosymmetry, a feature reminiscent of the bacterial RND proteins (Figure 3B, left). In fact, the core regions of domains C and I, including the central  $\beta$  sheet and two helices, are nearly identical to the periplasmic porter domains of AcrB, reflecting evolutionary conservation (Figure S2C). However, close examination shows that the two repeats of TMD are related to each other by 180° rotation, whereas the core regions of domains C and I are related by ~160° rotation (Figure 3B).

Domain C and domain I each connect to the first TM in the internal repeat (TM2 and TM8, respectively) through an extended linker and end with a helix whose extension forms the second

TM in the respective repeat (TM3 and TM9, respectively). For simplicity, we designate the last helices in domains C and I the “neck helices” (Figure 3C). The neck helices may represent the coupling elements between the respective luminal domains and TMD repeats in case of concerted conformational changes (Eicher et al., 2014). The organization of domains C and I resembles folded arms, whose reciprocal interactions involve the first helix in one domain against the  $\beta$  sheet in the other, as well as contacts between the distal loop regions (Figure 3C). Detailed analysis of interactions involving domain I is precluded at this resolution.

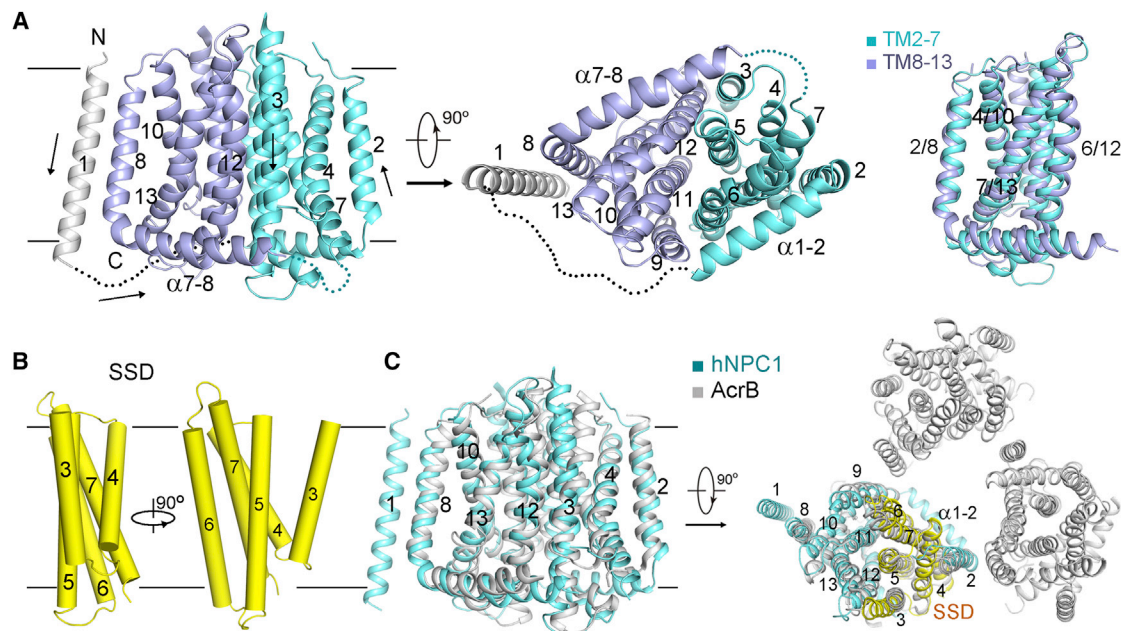

**Figure 2. Structure of the Transmembrane Domain TMD of hNPC1**

(A) TMs 2–13 of hNPC1 exhibit a characteristic resistance-nodulation-cell division superfamily fold. The two repeats in the RND fold are colored cyan and light purple, respectively. The invisible cytoplasmic segments are shown as dotted lines. The arrows in the left panel indicate the N→C orientation of the corresponding TMs. Right panel: TMs 2–7 are related to TMs 8–13 by a 180-degree rotation around an axis that is perpendicular to the membrane plane.

(B) The sterol sensing domain (SSD). TMs 3–7 of hNPC1 constitute the SSD that is also found in several proteins involved in sterol metabolism or signaling. Two perpendicular side views are shown.

(C) Structural similarity between the TMDs of hNPC1 and the bacterial multidrug efflux transporter AcrB. Right panel: the SSD-corresponding TMs in AcrB are exposed to the lipid bilayer in the context of trimer (PDB: 1IWG).

The NTD is like the “head” on top of the shoulder and arms formed by domains C and I. A number of polar and charged residues appear to constitute the interface between NTD and domain C. In particular, helix  $\alpha 3$  of NTD, which is enriched of polar residues, including Gln88/Gln92/Arg96, represents a major area contacting domain C. The sugar moieties attached to Asn524 and Asn557 of domain C may form hydrogen bonds with Gln88 and Asn169, respectively, in NTD (Figure 3D). It is of particular note that Arg518 is engaged in binding to NTD (Figure 3D). The single point mutations R518W or R518Q are disease related and led to reduced interaction between isolated domain C and NPC2 (Table S3) (Deffieu and Pfeffer, 2011).

Among the identified NPC disease-related mutations, 15 and 28 belong to NTD and domain C, respectively (Scott and Ioannou, 2004). Structural mapping suggested that nine residues are located at the interface between the luminal domains (Figure 3E and Table S3). Whether some mutations lead to misfolding of NPC1 in the ER as a result of disruption of domain interactions, particularly between domains C and I, awaits further investigation. Asn92 and Arg518 will be analyzed in the next session.

#### Structure-Guided Analysis of Cholesterol Transfer from hNPC2 to hNPC1

The structural elucidation of FL hNPC1 offers an opportunity to investigate the mechanism of NPC1 and NPC2-mediated cholesterol trafficking and to provide potential molecular inter-

pretations for reported biochemical observations. To establish the structure-function correlation, we employed two biochemical approaches: examination of cholesterol transfer from purified hNPC2 to hNPC1 variants in an in vitro assay system and measurement of the binding affinity between NPC2 to NPC1 using isothermal titration calorimetry (ITC).

In vitro cholesterol transfer assays were conducted with NPC2 and isolated NPC1(NTD) (Infante et al., 2008; Kwon et al., 2009; Wang et al., 2010). Modifying the established protocol, we set up an in vitro assay to examine cholesterol transfer from NPC2 to NPC1 variants that were designed on the basis of structural analysis (Figure 4A). Briefly, the FL NPC1 and NPC2 were respectively fused with His<sub>10</sub> and FLAG tags and purified to homogeneity. The [<sup>3</sup>H]cholesterol-loaded NPC2 was incubated with NPC1 for cholesterol transfer to occur. The mixture was then applied to nickel-NTA (Ni) resin to remove non-specific binding, and the eluent was sent for scintillation counting, which indicated the [<sup>3</sup>H]cholesterol retained by the tested NPC1 variants. The ratio between the readings of the quantified Ni eluent and the input [<sup>3</sup>H]cholesterol-bound NPC2 was used to assess the cholesterol transfer activity of the tested NPC1 variants.

As a proof of principle, we first examined several reported parameters and mutations. The binding between NPC2 and domain C of NPC1 (NPC1-C) was shown to be pH dependent (Deffieu and Pfeffer, 2011), and the cholesterol transfer activity between NPC2 and NPC1(NTD) varied at different pH values (Infante et al., 2008). Consistent with these observations, the

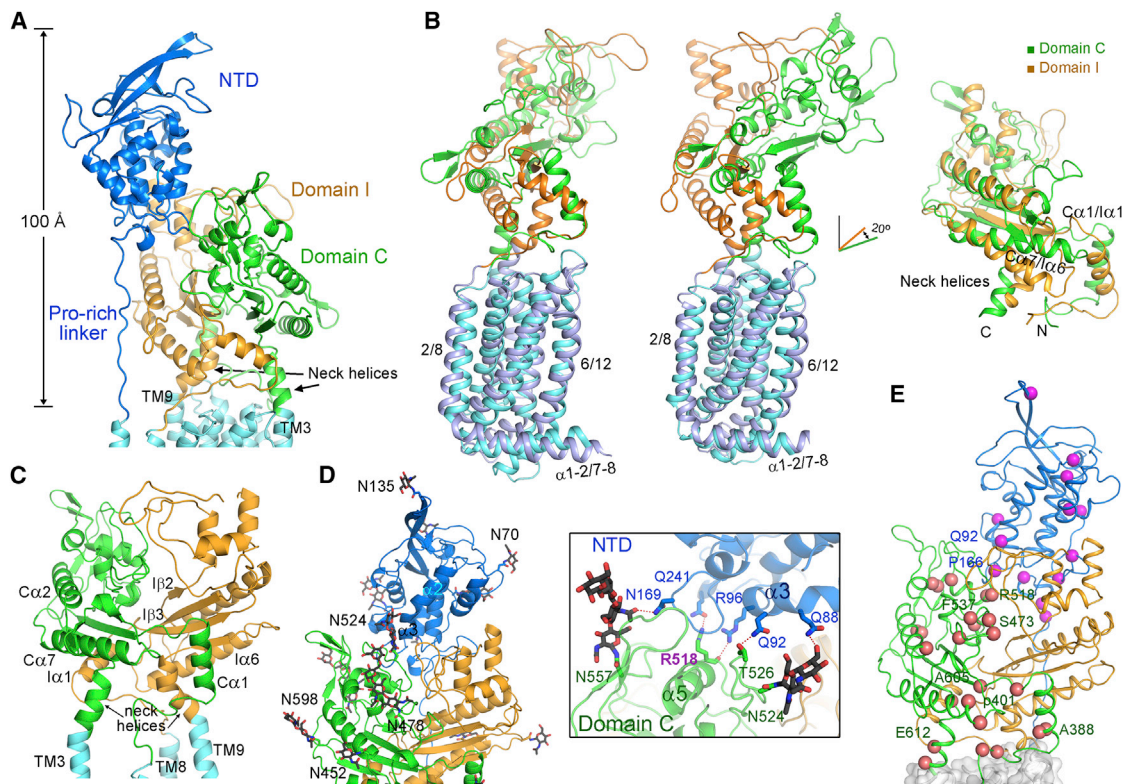

**Figure 3. Organization of the Three Luminal Domains of hNPC1**

(A) The overall structure of the luminal domains and their connections to TMD. The C-terminal helices in domains C and I whose extensions are TM3 and TM9, respectively, are designated the “Neck helices.”

(B) Structural similarity and difference between domains C and I. Left: in the absence of the NTD and TM1, the overall structure appears to have a 2-fold pseudosymmetry. Middle: the two halves are superimposed relative to TMD. Whereas the internal repeats of the TMD are related by 180° rotation, domains C and I are related by ~160°. Right: when domains C and I are superimposed relative to the central  $\beta$  sheet, structural deviations occur to the peripheral helices. The secondary elements in domains C and I are labeled with prefix “C” or “I,” respectively.

(C) Interactions between domains C and I. The extensive interface and the neck helices may confer structural stability to the two luminal domains relative to their respectively connected transmembrane repeats.

(D) Interactions between the NTD with domains C and I. Inset: potential hydrogen-bonds between residues in NTD and domain C. Note that the sugar moieties attached to Asn524 and Asn557 may also participate in the inter-domain packing.

(E) Structural mapping of NPC disease-related mutations. The  $C\alpha$  atoms of disease-associated residues in NTD and domain C are shown as spheres. The residues that may be involved in interactions between luminal domains are labeled. Due to the lack of reliable structural model, the mutations in domain I are not mapped.

activity of cholesterol transfer from NPC2 to FL NPC1 at pH 7.5 was only half of that at pH 5.5 in our assay system (Figure 4B). Two well-characterized NTD mutants, P202A/F203A and L175A/L176A, which are deficient in cholesterol binding and transfer, respectively, were then examined (Kwon et al., 2009). Both mutants showed pronounced reduction of cholesterol transfer at pH 5.5 (Figure 4B).

The crystal structures of NPC1(NTD) bound to cholesterol or 25-hydroxycholesterol (Kwon et al., 2009) allow reliable modeling of a cholesterol molecule into the FL hNPC1, which would support structure-guided mutagenesis for identification of additional elements in cholesterol transfer (Figure 4C). The disease-related mutation R518W led to reduced binding between NPC2 and NPC1-C (Defieu and Pfeffer, 2011). In our transfer assay, NPC1-R518W retained only half of the cholesterol transfer activity compared to the wild-type (WT) NPC1 at pH 5.5 (Figure 4D).

Noting that Arg518 is mapped to the interface between the NTD and domain C, particularly in the vicinity of Leu175/Leu176 in NTD, we then examined the adjacent interface residues (Figures 3D and 4C). Deletion of the NTD (residues 25–257) abolished more than 90% of cholesterol transfer from NPC2 to NPC1- $\Delta$ NTD. The variant containing three point mutations on NTD (Q88A/Q92A/R96A) lost up to 40% of the transfer activity (Figure 4D). Interestingly, these three residues line up on helix  $\alpha$ 3 of NTD, which guards one side of the entrance to the cholesterol binding pocket, while the previously identified residues involved in cholesterol transfer, exemplified by Leu175 and Leu176, are mapped to the opposite side of the entrance.

#### Binding of NPC2 to NTD and Domain C Is Required for Cholesterol Transfer

We next examined the binding affinities between NPC2 and several NPC1 variants using ITC (Table 1, Figure S4). Consistent

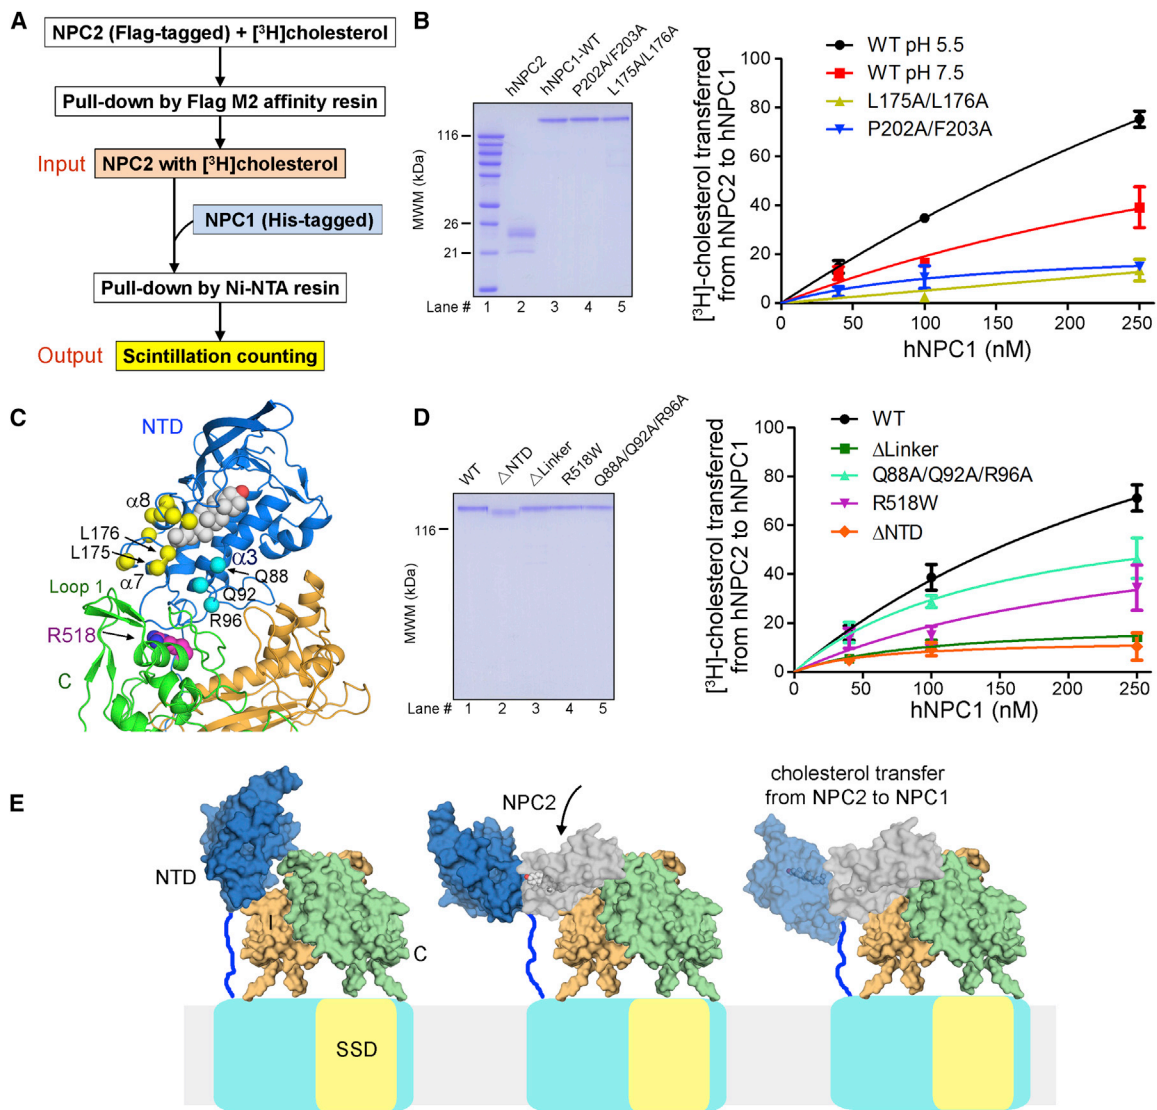

**Figure 4. Interface Residues between NTD and Domain C Are Involved in Cholesterol Transfer from NPC2 to NPC1**

(A) The simplified protocol for an in vitro cholesterol transfer assay using purified full-length (FL) hNPC1 and hNPC2. Please refer to the [Supplemental Experimental Procedures](#) for details.

(B) Validation of the assay system with reported conditions and mutations. Left: the purified hNPC2 and hNPC1 variants used in the assay. Right: Ala substitution of the previously identified residues for sterol binding or transfer markedly reduced cholesterol transfer from NPC2 to FL NPC1 in our assay (Kwon et al., 2009). For each data point, the reading of the negative control, whereby NPC1 was omitted in the pull-down experiment, was subtracted from the output, and the resulted reading was normalized against the input and presented in percentage. Each data point is the average of three independent experiments. Error bars represent SD.

(C) Structural mapping of the NTD residues that are important for cholesterol transfer between NPC2 and NPC1 (NTD). A cholesterol molecule, shown as silver spheres, was modeled based on the crystal structure of cholesterol-bound NTD (PDB: 3GKI). The C $\alpha$  atoms of the previously characterized functional residues (Wang et al., 2010) and the ones identified in this study are shown as yellow and cyan spheres, respectively. Note that these residues are in the vicinity of the domain C residue Arg518, which is disease related and important for NPC2 recruitment (Deffieu and Pfeffer, 2011).

(D) The cholesterol transfer activities of NPC1 variants designed on the basis of the EM structure. Gln88/Gln92/Arg96 and Arg518 are on the interface between NTD and domain C (please refer to the inset of Figure 3D).

(E) The structure and biochemical characterizations suggest that sterol transfer between NPC2 and NPC1 necessitates proper accommodation of NPC2 by NPC1 (NTD) and NPC1-C. Shown here are domain models, whose relative orientations and scales may be different from the real structure. Arrival of cholesterol-bound NPC2 may dislodge NTD from its interactions with domains C and I. NPC2 may be oriented by both the NTD and NPC1-C for the hydrophobic handoff of cholesterol to the NTD.

with the reported pH-dependent association between NPC1-C and NPC2 (Deffieu and Pfeffer, 2011), the FL NPC1 binds to NPC2 with a  $K_d$  of  $\sim 16 \mu\text{M}$  at pH 6.0 but  $\sim 217 \mu\text{M}$  at

pH 7.5. In addition, the single point mutation R518W reduced the affinity to  $\sim 177 \mu\text{M}$  at pH 6.0 (Figures S4A–S4C). The binding affinities between NPC1 variants and NPC2 appear to be

**Table 1. Binding Affinity between NPC2 and the NPC1 Variants Measured by ITC**

| NPC1 Variants | $K_d$ ( $\mu$ M) | NPC1 Variants   | $K_d$ ( $\mu$ M) |
|---------------|------------------|-----------------|------------------|
| FL (pH 7.5)   | 216.9 $\pm$ 35.3 | $\Delta$ NTD    | 209.6 $\pm$ 19.9 |
| FL (pH 6.0)   | 15.8 $\pm$ 1.2   | L175A/L176A     | 162.9 $\pm$ 13.8 |
| R518W         | 177.3 $\pm$ 15.0 | $\Delta$ linker | 266.0 $\pm$ 25.5 |
| NTD           | n/a              | Q88A/Q92A/R96A  | 275.5 $\pm$ 14.3 |

Except for the first measurement, all the others were performed at pH 6.0. The indicated mutations were generated to full-length (FL) human NPC1. NTD: residues 1–252;  $\Delta$ NTD: internal deletion of residues 25–257;  $\Delta$ Linker: internal deletion of the Pro-rich segments <sub>249</sub>PKPQPPPPP<sub>257</sub>.

correlated with their cholesterol transfer activities (Figures 4B and 4D).

Despite that the NPC1(NTD) is the acceptor for cholesterol handed over from NPC2, interaction between NPC2 and isolated NTD was not detected, suggesting that NTD alone may be insufficient for stable interaction with NPC2. Nevertheless, deletion of NTD marked reduced the binding between NPC1 and NPC2 (Figures S4D and S4E). Furthermore, consistent with the reduced cholesterol transfer activities, the hNPC1 variants L175A/L176A and Q88A/Q92A/R96A both showed decreased binding with NPC2 at pH 6.0 (Figures S4F and S4G), supporting the notion that NTD is required for the anchorage of NPC2 to NPC1.

The observation that the interface constituents between NTD and domain C, exemplified by Gln88/Gln92/Arg96 and Arg518, are important for both NPC2 binding and cholesterol transfer suggests that the structure presented here may represent an inactive state. It is thereby reasonable to postulate that structural rearrangements, presumably a displacement of the NTD, would occur to expose these interface residues for interaction with NPC2 (Figure 4E). Note that the NTD is invisible in the second class of EM reconstruction of NPC1 (Figures S1D and S1F), implying potential flexibility of this domain. On the other hand, the proximity between Leu175/Leu176 and the interface residues implicates that NTD and domain C may together constitute the docking site to orient NPC2 for cholesterol transfer to NTD (Figure 4E). Indeed, deletion of the Pro-rich linker (<sub>249</sub>PKPQPPPPP<sub>257</sub>), which would leave the NTD close to the membrane surface and away from domain C, led to reduced affinity with NPC2 (Table 1 and Figure S4H) and similar loss of cholesterol transfer activity as NPC1- $\Delta$ NTD (Figure 4D).

The structural analysis, cholesterol transfer assay, and ITC measurement support a mechanism whereby the NTD and domain C together constitute the scaffold to properly accommodate NPC2 for hydrophobic handoff of cholesterol to the pocket of NTD (Figure 4E). However, the molecular basis for the pH-dependent affinity between NPC1 and NPC2 or between domain C and NPC2 remains to be elucidated. Moreover, the mechanism of the subsequent cholesterol delivery from NTD to the membrane region is even more intriguing (Figure S5).

### Interaction between EBOV-GPcl and hNPC1

The structure of FL hNPC1 provides a template for examination of the interaction with EBOV-GPcl. The purified recombinant hNPC1 binds to GPcl, interestingly, also in a pH dependent

manner as measured using surface plasmon resonance (SPR). At pH 7.5, the measured  $K_d$  value is  $\sim$ 95  $\mu$ M, whereas the affinity increases to 2.4  $\mu$ M at pH 6.0, almost 40-fold higher (Figure 5A).

When the crystal structure of the complex between NPC1-C and EBOV-GPcl is docked to the EM reconstruction of hNPC1, there is no clash between EBOV-GPcl and other domains. With the tip of EBOV-GPcl anchoring to the two loops of NPC1-C (Wang et al., 2016), EBOV-GPcl is far away from domain I (Figure 5B). Notably, a major rearrangement of helix  $\alpha$ 1 is observed between the crystal structures of isolated domain C and the EM architecture of the full-length protein. The helix, which connects domain C to TM2, folds back toward the central  $\beta$  sheet in the isolated domain (Figure 5B).

In the docking model, the side facet of GPcl appears to contact hNPC1(NTD) (Figure 5C). However, the NTD-deleted NPC1 binds to GPcl with a similar affinity as the FL protein (Figure 5D). In addition, the interaction between NTD and GPcl cannot be reliably detected by SPR (Figure S6A), suggesting a negligible role of NTD in recruiting GPcl.

Another interesting question is the stoichiometric ratio between NPC1 and GPcl. Despite that purified hNPC1 exists as a monomer, the GPcl forms a trimer in isolation or in the complex with domain C (Lee et al., 2008; Wang et al., 2016). We attempted to dock three hNPC1 molecules to the trimeric complex of EBOV-GPcl and NPC1-C (Figure S6B). The luminal domains of NPC1 are all compatible in the trimeric assembly without inter-protomer contact. However, the symmetry axis of the TMD in each protomer tilts away from the central axis of the trimer. Consequently, the TMDs in the three protomers no longer stay in the same membrane plane, and there is slight clash between TM1 in one protomer and TM3 in the adjacent one (Figure S6B). This structural model raised several possibilities. If multiple NPC1 molecules bind to a trimeric EBOV-GPcl simultaneously, the FL NPC1 would have to undergo conformational changes to avoid clash at TMDs. Alternatively, binding of EBOV would have to induce deformation of the membrane where NPC1 proteins are embedded. A third possibility is that the GPcl trimer may simply bind to one NPC1. Addressing these questions necessitates structural elucidation of the complex between the EBOV-GPcl and FL NPC1 (hereafter referred to as the NPC1-GPcl complex).

### Cryo-EM Architecture of the NPC1-GPcl Complex

The hNPC1-GPcl complex was assembled at pH 5.5 and examined with cryo-EM (Figure S7). Three classes of reconstructions, in which the GPcl was clearly discernible, were obtained (Figure 6A). At higher threshold, NTD becomes invisible in Class 2, while neither NTD nor GPcl can be seen in Class 3. Nevertheless, the presence of a GPcl trimer and a NPC1 monomer was unambiguous in all three classes with low-pass filter. Therefore, one detergent micelle-surrounded NPC1 monomer binds to one GPcl trimer (Figure 6A).

A 6.6 Å reconstruction of NPC1-GPcl complex was obtained out of 50,223 particles (Class 1), into which the crystal structures of GPcl and the 4.4 Å cryo-EM structure of NPC1 can be easily docked (Figure 6B and Table S4). One protomer of GPcl binds to Loop 1 and Loop 2 of NPC1-C (Figure 6C). Notably, there is no direct contact between GPcl and NPC1(NTD) in the EM



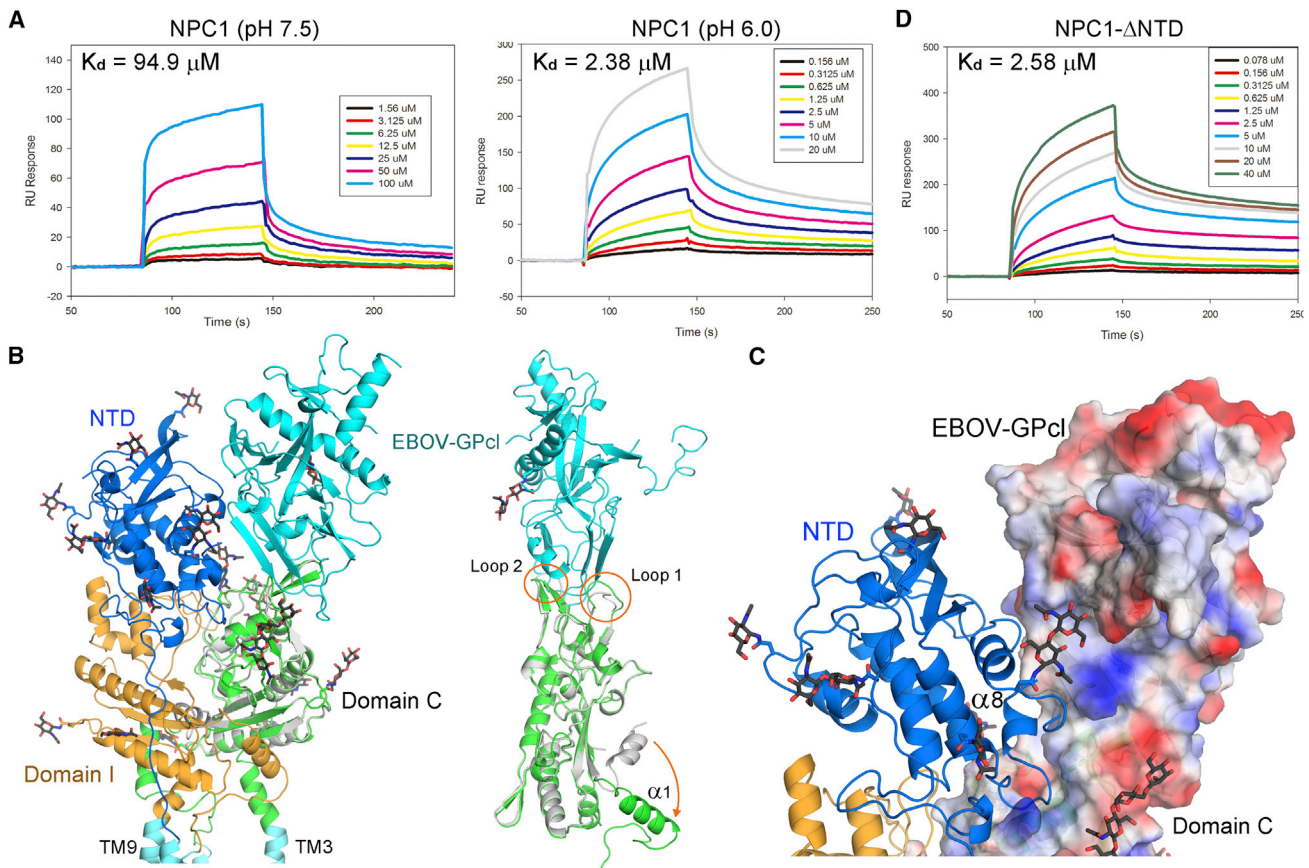

**Figure 5. Examination of the Interaction between Cleaved Glycoprotein of Ebola Virus (EBOV-GPcl) and FL NPC1**

(A) The interaction between EBOV-GPcl and NPC1 is pH dependent. The binding affinity is measured using SPR.

(B) Docking of the domain C-GPcl complex (PDB: 5F1B) to the EM structure of hNPC1. Right: conformational changes of domain C. Note the pronounced re-arrangement of helix  $\alpha 1$  of domain C between the crystal structure of isolated domain (silver) and the EM structure of FL protein (green).

(C) The docking model suggested a potential interface between NPC1(NTD) and EBOV-GPcl. The domain C-GPcl complex is shown as semi-transparent surface electrostatic potential calculated in PyMol.

(D) The NTD-deleted hNPC1 binds to EBOV-GPcl with similar affinity as FL protein at pH 6.0.

map (Figure 6B). In fact, compared to the crystal structure of the complex between GPcl and NPC1-C, there is a slight tilt of GPcl that may be achieved through minor shift of the loops of NPC1-C (Figure 6D). Consequently, GPcl slightly moves away from NTD in the EM structure, unable to form the predicted contact as seen in the docking model (Figures 5C and 6D). Nevertheless, the NTD has a glycosylation site facing GPcl (Figures 5C and 6D). It is possible that glycosyl moieties may fill up the void between NTD and GPcl.

The EM architecture of NPC1-GPcl appears to support the biochemical characterizations (Figures 5D and S6A) and previous reports that NTD is not required for GPcl binding or Ebola infection (Miller et al., 2012). Nevertheless, GPcl binds to FL NPC1 and isolated NPC1-C with  $K_d$  values of 2.38  $\mu\text{M}$  and 27.6  $\mu\text{M}$ , respectively, at pH 6.0 (Figures 5A and S6A). The higher affinity with FL NPC1 may be achieved through a scaffolding role conferred by the other luminal domains, which may orient NPC1-C to an optimal position for binding to GPcl. Supporting this notion, NPC1L1, which lacks filovirus receptor activity, became equally efficient as NPC1 in mediating Ebola virus infection when the

NPC1L1-C was replaced by NPC1-C and more efficient than a minimal NPC1-C based receptor (Krishnan et al., 2012).

Ebola virus is attracted to host cell surface by diverse attachment factors such as T cell immunoglobulin and mucin domain-containing family molecules (Wang et al., 2015). After attachment, Ebola virus is internalized into endosome. NPC1 was suggested to serve as an essential high-affinity intracellular receptor for EBOV-GPcl (Hofmann-Winkler et al., 2012; Hunt et al., 2012; White and Schornberg, 2012). However, GPcl binds to isolated NPC1-C with a  $K_d$  of  $\sim 140 \mu\text{M}$  at pH 7.5 (Wang et al., 2016), considerably lower than the nanomolar (nM) range of other highly pathogenic viruses such as SARS-CoV and MERS-CoV (Lu et al., 2013). The observation reported here that the binding affinity between NPC1 and GPcl was enhanced at lower pH may provide a plausible explanation to reconcile the discrepancy considering the intracellular environment for the endocytosed virus. Nevertheless, the structural basis for the pH dependence awaits future examination.

Despite the many remaining enigmas, the EM structures of hNPC1 and the hNPC1-GPcl complex, as well as the

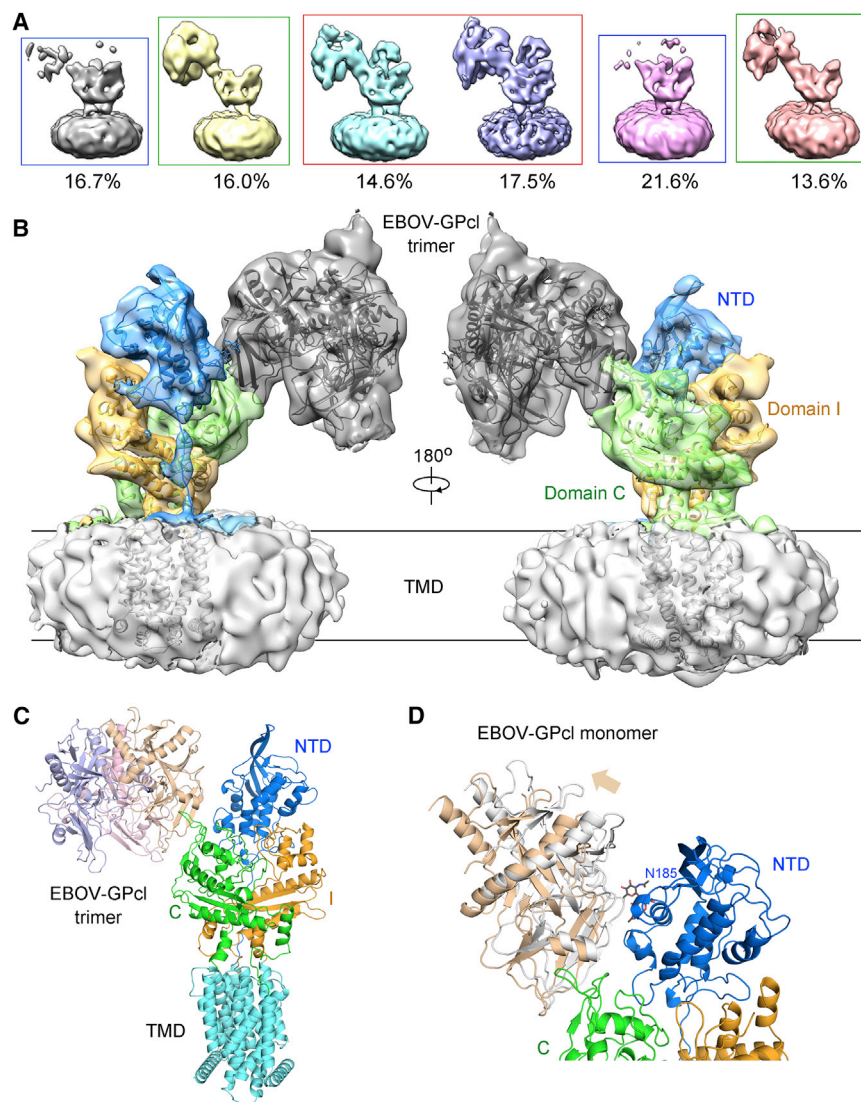

**Figure 6. Cryo-EM Architecture of the Complex between EBOV-GPcl and FL hNPC1**

(A) Summary of the 3D classifications of the NPC1-GPcl complex. Please refer to Figure S7 for cryo-EM data processing.

(B) One EBOV-GPcl trimer binds to one NPC1 monomer. The 6.6 Å cryo-EM reconstruction of the hNPC1-GPcl complex obtained from the two classes indicated by the red box in (A).

(C) Structural model of the NPC1-GPcl complex. The trimeric crystal structure of EBOV-GPcl (PDB: 5F1B) and the EM structure of NPC1 were fitted to the cryo-EM map in Chimera.

(D) Deviation between the cryo-EM reconstruction and the docking model of GPcl in the complex. Despite the seeming contact between GPcl and NTD in the docking model (colored silver), the GPcl protomer (colored wheat) that contacts domain C slightly moves away from NTD in the cryo-EM reconstruction. Consequently, no direct contact between GPcl and NTD was seen in the EM map. It remains to be investigated whether glycosyl moieties may fill up the void between NTD and GPcl.

structure-guided biochemical characterizations reported here, represent a major step toward mechanistic understanding of NPC1-mediated intracellular cholesterol trafficking and Ebola virus infection. It is noteworthy that the molecular weight of hNPC1 protein is around 140 kDa. Structural resolution of the relatively small proteins by cryo-EM offers unprecedented opportunity for structural and mechanistic investigation of a broad range of biologically significant molecules. Furthermore, cryo-EM has the advantage of revealing structurally stable glycosylation sites. Hence, cryo-EM may also illuminate the avenue to the structural and functional characterizations concerning glycosylation (Li et al., 2015).

## EXPERIMENTAL PROCEDURES

### Cryo-EM Data Collection and Processing of hNPC1

The details of recombinant expression, purification, and biochemical characterizations of hNPC1, hNPC2 and GPcl can be found in the Supplemental Experimental Procedures.

The cryo sample was prepared with FEI Vitrobot Mark IV. An aliquot of 4  $\mu$ l purified hNPC1 at concentration of  $\sim$ 15 mg/ml was applied to glow-discharged Quantifoil (1.2/1.3) 200 mesh Cu grid. After being blotted with filter paper for 3.0 s, the grid was plunged into liquid ethane cooled with liquid nitrogen. A total of 4,026 micrograph stacks were semi-automatically collected with UCSF Image4 on Titan Krios at 300 kV equipped with Gatan K2 Summit at a nominal magnification of 22,500 $\times$  with a defocus range of 1.5–3.0  $\mu$ m. Each stack was exposed for 8 s with an exposing time of 250 ms per frame, resulting in 32 frames per stack. The total dose rate was about 50  $e^-/\text{\AA}^2$  for each stack. The drift of the stacks was corrected with *dose\_driftcorr* (Li et al., 2013). After motion correction, each frame in the stacks was filtered according to its exposing dose and added together with SumMovie (Grant and Grigorieff, 2015). The defocus was estimated with *Gctf* (Zhang, 2016).

A total of 1,825,157 particles were autopicked with RELION 1.4 (Scheres, 2012a, b, 2015). After several rounds of 2D classification using RELION 1.4, a total of 506,234 particles were selected and subjected to 3D classifications. The 3D initial model was built from typical 2D class averages with SIMPLE (Elmlund and Elmlund, 2012). We attempted to 3D classify these particles with different number of groups, such as 4, 6, or 8 classes. The particles always fell into two major subsets, one with an additional luminal domain (the NTD) and the other with a seemingly 2-fold pseudosymmetry without the protruding domain. We therefore classified the particles into two classes according to the visibility of this additional luminal domain with global angular searching in RELION 1.4. Then each class was further 3D classified with local angular searching in RELION 1.4. During the local angular searching, a “random-phase 3D classification” method, which is described below, was applied to eliminate bad particles with home-modified RELION 1.4. The remaining particles of each class were subjected to 3D auto-refinement with RELION 1.4 separately. After 3D auto-refinement, the Class 1 particles of NPC1 were further polished with RELION 1.4 and then subjected to 3D auto-refinement. The final resolution was estimated with the gold-standard Fourier shell correlation criterion (Scheres and Chen, 2012) with high-resolution noise substitution method

(Chen et al., 2013). Local resolutions were estimated with ResMap (Kucukelbir et al., 2014). The method of model building and refinement, as well as the cryo-EM analysis of NPC1-GPcl, can be found in the [Supplemental Experimental Procedures](#).

### Random-Phase 3D Classification

The source code and the testing details of the “random-phase 3D classification” method will be provided upon e-mail request addressed to Q. Z. Briefly, in each cycle of 3D classification, the particles were classified into two groups with sufficient number of iterations. In each iteration of the 3D classification, the second reference was the same as the first reference but phase-randomized above a specified resolution. After each cycle of 3D classification, the particles prone to be classified into the phase-randomized class were removed from the next cycle of 3D classification. The resolution above which the second reference was phase-randomized was gradually increased (Table S1). The remaining particles were then subjected to 3D auto-refinement using RELION 1.4.

### ACCESSION NUMBERS

The atomic coordinates of NPC1 and NPC1-GPcl complex have been deposited in the Protein Data Bank with the accession code PDB: 3JD8 and PDB: 5JNX, respectively. The 4.4 Å and 6.7 Å EM maps of NPC1 and the 6.6 Å EM map of NPC1-GPcl have been deposited in EMDB with accession codes EMD-6640, EMD-6641, and EMD-8169, respectively.

### SUPPLEMENTAL INFORMATION

Supplemental Information includes Supplemental Experimental Procedures, seven figures, and four tables and can be found with this article online at <http://dx.doi.org/10.1016/j.cell.2016.05.022>.

### AUTHOR CONTRIBUTIONS

N.Y. and G.F.G. conceived the project. N.Y., X.G., and Q.Z. designed all experiments. G.F.G., T.W., Y.S., and P.W. designed experiments related to EBOV-GPcl. X.G., H.Q., X. Zhou, P.C., W.H. and X. Zhao generated NPC1 variants and carried out NPC1 and NPC2-related biochemical characterizations. T.W. and X.W. prepared GPcl and characterized the interactions between NPC1 and GPcl. Q.Z. developed the random-phase 3D classification method. Q.Z., H.Q., J.W. and X. Zhou conducted the cryo-EM analysis of NPC1 and NPC1-GPcl. All authors contributed to data analysis. X.G., J.W., X. Zhou, G.F.G., Y.S., T.W., and P.W. participated in the manuscript editing and discussion. N.Y. and Q.Z. wrote the manuscript.

### ACKNOWLEDGMENTS

We thank Jianlin Lei, Yanji Xu, and Xiaomei Li for technical support. We thank Xueming Li and Mingxu Hu for critical discussions. We thank the Tsinghua University Branch of China National Center for Protein Sciences (Beijing) for providing the facility support. The computation was completed on the “Explorer 100” cluster system of Tsinghua National Laboratory for Information Science and Technology. This work was supported by funds from the Ministry of Science and Technology of China (2015CB9101012014, ZX09507003006), National Natural Science Foundation of China (project 31321062 and 81590761), the special project of Ebola virus research from the President Foundation of Chinese Academy of Sciences, and Strategic Priority Research Program of the Chinese Academy of Sciences (XDB08020100). The research of Nieng Yan was supported in part by an International Early Career Scientist grant from the Howard Hughes Medical Institute and an endowed professorship from Bayer Healthcare.

Received: March 18, 2016

Revised: April 22, 2016

Accepted: May 3, 2016

Published: May 26, 2016

### REFERENCES

- Altmann, S.W., Davis, H.R., Jr., Zhu, L.J., Yao, X., Hoos, L.M., Tetzloff, G., Iyer, S.P.N., Maguire, M., Golovko, A., Zeng, M., et al. (2004). Niemann-Pick C1 Like 1 protein is critical for intestinal cholesterol absorption. *Science* 303, 1201–1204.
- Burke, R., Nellen, D., Bellotto, M., Hafen, E., Senti, K.A., Dickson, B.J., and Basler, K. (1999). Dispatched, a novel sterol-sensing domain protein dedicated to the release of cholesterol-modified hedgehog from signaling cells. *Cell* 99, 803–815.
- Carette, J.E., Raaben, M., Wong, A.C., Herbert, A.S., Obernosterer, G., Mulherkar, N., Kuehne, A.I., Kranzusch, P.J., Griffin, A.M., Ruthel, G., et al. (2011). Ebola virus entry requires the cholesterol transporter Niemann-Pick C1. *Nature* 477, 340–343.
- Carstea, E.D., Morris, J.A., Coleman, K.G., Loftus, S.K., Zhang, D., Cummings, C., Gu, J., Rosenfeld, M.A., Pavan, W.J., Krizman, D.B., et al. (1997). Niemann-Pick C1 disease gene: homology to mediators of cholesterol homeostasis. *Science* 277, 228–231.
- Chandran, K., Sullivan, N.J., Felbor, U., Whelan, S.P., and Cunningham, J.M. (2005). Endosomal proteolysis of the Ebola virus glycoprotein is necessary for infection. *Science* 308, 1643–1645.
- Chen, S., McMullan, G., Faruqi, A.R., Murshudov, G.N., Short, J.M., Scheres, S.H., and Henderson, R. (2013). High-resolution noise substitution to measure overfitting and validate resolution in 3D structure determination by single particle electron cryomicroscopy. *Ultramicroscopy* 135, 24–35.
- Côté, M., Misasi, J., Ren, T., Bruchez, A., Lee, K., Filone, C.M., Hensley, L., Li, Q., Ory, D., Chandran, K., and Cunningham, J. (2011). Small molecule inhibitors reveal Niemann-Pick C1 is essential for Ebola virus infection. *Nature* 477, 344–348.
- Davies, J.P., and Ioannou, Y.A. (2000). Topological analysis of Niemann-Pick C1 protein reveals that the membrane orientation of the putative sterol-sensing domain is identical to those of 3-hydroxy-3-methylglutaryl-CoA reductase and sterol regulatory element binding protein cleavage-activating protein. *J. Biol. Chem.* 275, 24367–24374.
- Davies, J.P., Chen, F.W., and Ioannou, Y.A. (2000). Transmembrane molecular pump activity of Niemann-Pick C1 protein. *Science* 290, 2295–2298.
- Deffieu, M.S., and Pfeffer, S.R. (2011). Niemann-Pick type C 1 function requires luminal domain residues that mediate cholesterol-dependent NPC2 binding. *Proc. Natl. Acad. Sci. USA* 108, 18932–18936.
- DeLano, W.L. (2002). The PyMOL Molecular Graphics System on World Wide Web <http://www.pymol.org>.
- Delmar, J.A., Su, C.C., and Yu, E.W. (2014). Bacterial multidrug efflux transporters. *Annu. Rev. Biophys.* 43, 93–117.
- Doolman, R., Lechner, G.S., Avner, R., and Roitelman, J. (2004). Ubiquitin is conjugated by membrane ubiquitin ligase to three sites, including the N terminus, in transmembrane region of mammalian 3-hydroxy-3-methylglutaryl coenzyme A reductase: implications for sterol-regulated enzyme degradation. *J. Biol. Chem.* 279, 38184–38193.
- Eicher, T., Seeger, M.A., Anselmi, C., Zhou, W., Brandstätter, L., Verrey, F., Diederichs, K., Faraldo-Gómez, J.D., and Pos, K.M. (2014). Coupling of remote alternating-access transport mechanisms for protons and substrates in the multidrug efflux pump AcrB. *eLife* 3, e03145.
- Elmlund, D., and Elmlund, H. (2012). SIMPLE: Software for ab initio reconstruction of heterogeneous single-particles. *J. Struct. Biol.* 180, 420–427.
- Grant, T., and Grigorieff, N. (2015). Measuring the optimal exposure for single particle cryo-EM using a 2.6 Å reconstruction of rotavirus VP6. *eLife* 4, e06980.
- Hofmann-Winkler, H., Kaup, F., and Pöhlmann, S. (2012). Host cell factors in filovirus entry: novel players, new insights. *Viruses* 4, 3336–3362.
- Hooper, J.E., and Scott, M.P. (1989). The Drosophila patched gene encodes a putative membrane protein required for segmental patterning. *Cell* 59, 751–765.

- Hua, X., Nohturfft, A., Goldstein, J.L., and Brown, M.S. (1996). Sterol resistance in CHO cells traced to point mutation in SREBP cleavage-activating protein. *Cell* **87**, 415–426.
- Hunt, C.L., Lennemann, N.J., and Maury, W. (2012). Filovirus entry: a novelty in the viral fusion world. *Viruses* **4**, 258–275.
- Infante, R.E., Wang, M.L., Radhakrishnan, A., Kwon, H.J., Brown, M.S., and Goldstein, J.L. (2008). NPC2 facilitates bidirectional transfer of cholesterol between NPC1 and lipid bilayers, a step in cholesterol egress from lysosomes. *Proc. Natl. Acad. Sci. USA* **105**, 15287–15292.
- Istvan, E.S., Palnitkar, M., Buchanan, S.K., and Deisenhofer, J. (2000). Crystal structure of the catalytic portion of human HMG-CoA reductase: insights into regulation of activity and catalysis. *EMBO J.* **19**, 819–830.
- Krishnan, A., Miller, E.H., Herbert, A.S., Ng, M., Ndungo, E., Whelan, S.P., Dye, J.M., and Chandran, K. (2012). Niemann-Pick C1 (NPC1)/NPC1-like1 chimeras define sequences critical for NPC1's function as a filovirus entry receptor. *Viruses* **4**, 2471–2484.
- Kucukelbir, A., Sigworth, F.J., and Tagare, H.D. (2014). Quantifying the local resolution of cryo-EM density maps. *Nat. Methods* **11**, 63–65.
- Kuwabara, P.E., and Labouesse, M. (2002). The sterol-sensing domain: multiple families, a unique role? *Trends Genet.* **18**, 193–201.
- Kwon, H.J., Abi-Mosleh, L., Wang, M.L., Deisenhofer, J., Goldstein, J.L., Brown, M.S., and Infante, R.E. (2009). Structure of N-terminal domain of NPC1 reveals distinct subdomains for binding and transfer of cholesterol. *Cell* **137**, 1213–1224.
- Lee, J.E., Fusco, M.L., Hessell, A.J., Oswald, W.B., Burton, D.R., and Saphire, E.O. (2008). Structure of the Ebola virus glycoprotein bound to an antibody from a human survivor. *Nature* **454**, 177–182.
- Li, X., Mooney, P., Zheng, S., Booth, C.R., Braunfeld, M.B., Gubbens, S., Agard, D.A., and Cheng, Y. (2013). Electron counting and beam-induced motion correction enable near-atomic-resolution single-particle cryo-EM. *Nat. Methods* **10**, 584–590.
- Li, J., Deffieu, M.S., Lee, P.L., Saha, P., and Pfeffer, S.R. (2015). Glycosylation inhibition reduces cholesterol accumulation in NPC1 protein-deficient cells. *Proc. Natl. Acad. Sci. USA* **112**, 14876–14881.
- Loftus, S.K., Morris, J.A., Carstea, E.D., Gu, J.Z., Cummings, C., Brown, A., El-lison, J., Ohno, K., Rosenfeld, M.A., Tagle, D.A., et al. (1997). Murine model of Niemann-Pick C disease: mutation in a cholesterol homeostasis gene. *Science* **277**, 232–235.
- Long, F., Su, C.C., Zimmermann, M.T., Boyken, S.E., Rajashankar, K.R., Jernigan, R.L., and Yu, E.W. (2010). Crystal structures of the CusA efflux pump suggest methionine-mediated metal transport. *Nature* **467**, 484–488.
- Lu, G., Hu, Y., Wang, Q., Qi, J., Gao, F., Li, Y., Zhang, Y., Zhang, W., Yuan, Y., Bao, J., et al. (2013). Molecular basis of binding between novel human coronavirus MERS-CoV and its receptor CD26. *Nature* **500**, 227–231.
- Lu, F., Liang, Q., Abi-Mosleh, L., Das, A., De Brabander, J.K., Goldstein, J.L., and Brown, M.S. (2015). Identification of NPC1 as the target of U18666A, an inhibitor of lysosomal cholesterol export and Ebola infection. *eLife* **4**, e12177.
- Luskey, K.L., and Stevens, B. (1985). Human 3-hydroxy-3-methylglutaryl coenzyme A reductase. Conserved domains responsible for catalytic activity and sterol-regulated degradation. *J. Biol. Chem.* **260**, 10271–10277.
- Malathi, K., Higaki, K., Tinkelenberg, A.H., Balderes, D.A., Almanzar-Paramio, D., Wilcox, L.J., Erdeniz, N., Redican, F., Padamsee, M., Liu, Y., et al. (2004). Mutagenesis of the putative sterol-sensing domain of yeast Niemann-Pick C-related protein reveals a primordial role in subcellular sphingolipid distribution. *J. Cell Biol.* **164**, 547–556.
- Martín, V., Carrillo, G., Torroja, C., and Guerrero, I. (2001). The sterol-sensing domain of Patched protein seems to control Smoothened activity through Patched vesicular trafficking. *Curr. Biol.* **11**, 601–607.
- Millard, E.E., Gale, S.E., Dudley, N., Zhang, J., Schaffer, J.E., and Ory, D.S. (2005). The sterol-sensing domain of the Niemann-Pick C1 (NPC1) protein regulates trafficking of low density lipoprotein cholesterol. *J. Biol. Chem.* **280**, 28581–28590.
- Millat, G., Marçais, C., Tomasetto, C., Chikh, K., Fensom, A.H., Harzer, K., Wenger, D.A., Ohno, K., and Vanier, M.T. (2001). Niemann-Pick C1 disease: correlations between NPC1 mutations, levels of NPC1 protein, and phenotypes emphasize the functional significance of the putative sterol-sensing domain and of the cysteine-rich luminal loop. *Am. J. Hum. Genet.* **68**, 1373–1385.
- Miller, E.H., Obernosterer, G., Raaben, M., Herbert, A.S., Deffieu, M.S., Krishnan, A., Ndungo, E., Sandesara, R.G., Carette, J.E., Kuehne, A.I., et al. (2012). Ebola virus entry requires the host-programmed recognition of an intracellular receptor. *EMBO J.* **31**, 1947–1960.
- Murakami, S., Nakashima, R., Yamashita, E., and Yamaguchi, A. (2002). Crystal structure of bacterial multidrug efflux transporter AcrB. *Nature* **419**, 587–593.
- Nakano, Y., Guerrero, I., Hidalgo, A., Taylor, A., Whittle, J.R.S., and Ingham, P.W. (1989). A protein with several possible membrane-spanning domains encoded by the *Drosophila* segment polarity gene *patched*. *Nature* **341**, 508–513.
- Naureckiene, S., Sleat, D.E., Lackland, H., Fensom, A., Vanier, M.T., Wattiaux, R., Jadot, M., and Lobel, P. (2000). Identification of HE1 as the second gene of Niemann-Pick C disease. *Science* **290**, 2298–2301.
- Neiss, W.F. (1984). A coat of glycoconjugates on the inner surface of the lysosomal membrane in the rat kidney. *Histochemistry* **80**, 603–608.
- Nohturfft, A., Brown, M.S., and Goldstein, J.L. (1998). Sterols regulate processing of carbohydrate chains of wild-type SREBP cleavage-activating protein (SCAP), but not sterol-resistant mutants Y298C or D443N. *Proc. Natl. Acad. Sci. USA* **95**, 12848–12853.
- Ohgami, N., Ko, D.C., Thomas, M., Scott, M.P., Chang, C.C.Y., and Chang, T.Y. (2004). Binding between the Niemann-Pick C1 protein and a photoactivatable cholesterol analog requires a functional sterol-sensing domain. *Proc. Natl. Acad. Sci. USA* **101**, 12473–12478.
- Pak, J.E., Ekedé, E.N., Kifle, E.G., O'Connell, J.D., 3rd, De Angelis, F., Tessema, M.B., Derfoufi, K.M., Robles-Colmenares, Y., Robbins, R.A., Goormaghtigh, E., et al. (2013). Structures of intermediate transport states of ZneA, a Zn(II)/proton antiporter. *Proc. Natl. Acad. Sci. USA* **110**, 18484–18489.
- Petersen, E.F., Goddard, T.D., Huang, C.C., Couch, G.S., Greenblatt, D.M., Meng, E.C., and Ferrin, T.E. (2004). UCSF Chimera—a visualization system for exploratory research and analysis. *J. Comput. Chem.* **25**, 1605–1612.
- Radhakrishnan, A., Sun, L.P., Kwon, H.J., Brown, M.S., and Goldstein, J.L. (2004). Direct binding of cholesterol to the purified membrane region of SCAP: mechanism for a sterol-sensing domain. *Mol. Cell* **15**, 259–268.
- Scheres, S.H. (2012a). A Bayesian view on cryo-EM structure determination. *J. Mol. Biol.* **415**, 406–418.
- Scheres, S.H. (2012b). RELION: implementation of a Bayesian approach to cryo-EM structure determination. *J. Struct. Biol.* **180**, 519–530.
- Scheres, S.H. (2015). Semi-automated selection of cryo-EM particles in RELION-1.3. *J. Struct. Biol.* **189**, 114–122.
- Scheres, S.H., and Chen, S. (2012). Prevention of overfitting in cryo-EM structure determination. *Nat. Methods* **9**, 853–854.
- Schornberg, K., Matsuyama, S., Kabsch, K., Delos, S., Bouton, A., and White, J. (2006). Role of endosomal cathepsins in entry mediated by the Ebola virus glycoprotein. *J. Virol.* **80**, 4174–4178.
- Scott, C., and Ioannou, Y.A. (2004). The NPC1 protein: structure implies function. *Biochim Biophys Acta.* **1685**, 8–13.
- Sennhauser, G., Bukowska, M.A., Briand, C., and Grütter, M.G. (2009). Crystal structure of the multidrug exporter MexB from *Pseudomonas aeruginosa*. *J. Mol. Biol.* **389**, 134–145.
- Sleat, D.E., Wiseman, J.A., El-Banna, M., Price, S.M., Verot, L., Shen, M.M., Tint, G.S., Vanier, M.T., Walkley, S.U., and Lobel, P. (2004). Genetic evidence for nonredundant functional cooperativity between NPC1 and NPC2 in lipid transport. *Proc. Natl. Acad. Sci. USA* **101**, 5886–5891.
- Strutt, H., Thomas, C., Nakano, Y., Stark, D., Neave, B., Taylor, A.M., and Ingham, P.W. (2001). Mutations in the sterol-sensing domain of Patched suggest

- a role for vesicular trafficking in Smoothed regulation. *Curr. Biol.* **11**, 608–613.
- Taipale, J., Cooper, M.K., Maiti, T., and Beachy, P.A. (2002). Patched acts catalytically to suppress the activity of Smoothed. *Nature* **418**, 892–897.
- Tseng, T.T., Gratwick, K.S., Kollman, J., Park, D., Nies, D.H., Goffeau, A., and Saier, M.H., Jr. (1999). The RND permease superfamily: an ancient, ubiquitous and diverse family that includes human disease and development proteins. *J. Mol. Microbiol. Biotechnol.* **1**, 107–125.
- Vanier, M.T. (2010). Niemann-Pick disease type C. *Orphanet J. Rare Dis.* **5**, 16.
- Vanier, M.T. (2015). Complex lipid trafficking in Niemann-Pick disease type C. *J. Inherit. Metab. Dis.* **38**, 187–199.
- Vanier, M.T., and Millat, G. (2003). Niemann-Pick disease type C. *Clin. Genet.* **64**, 269–281.
- Venter, H., Mowla, R., Ohene-Agyei, T., and Ma, S. (2015). RND-type drug efflux pumps from Gram-negative bacteria: molecular mechanism and inhibition. *Front Microbiol* **6**, 377.
- Wang, M.L., Motamed, M., Infante, R.E., Abi-Mosleh, L., Kwon, H.J., Brown, M.S., and Goldstein, J.L. (2010). Identification of surface residues on Niemann-Pick C2 essential for hydrophobic handoff of cholesterol to NPC1 in lysosomes. *Cell Metab.* **12**, 166–173.
- Wang, H., Qi, J., Liu, N., Li, Y., Gao, J., Zhang, T., Chai, Y., Gao, F., Zhang, H., Li, X., et al. (2015). Crystal structures of human TIM members: Ebolavirus entry-enhancing receptors. *Chin. Sci. Bull.* **60**, 3438–3453.
- Wang, H., Shi, Y., Song, J., Qi, J., Lu, G., Yan, J., and Gao, G.F. (2016). Ebola viral glycoprotein bound to its endosomal receptor Niemann-Pick C1. *Cell* **164**, 258–268.
- White, J.M., and Schornberg, K.L. (2012). A new player in the puzzle of filovirus entry. *Nat. Rev. Microbiol.* **10**, 317–322.
- Yabe, D., Xia, Z.P., Adams, C.M., and Rawson, R.B. (2002). Three mutations in sterol-sensing domain of SCAP block interaction with insig and render SREBP cleavage insensitive to sterols. *Proc. Natl. Acad. Sci. USA* **99**, 16672–16677.
- Yamaguchi, A., Nakashima, R., and Sakurai, K. (2015). Structural basis of RND-type multidrug exporters. *Front Microbiol* **6**, 327.
- Zhang, K. (2016). Gctf: Real-time CTF determination and correction. *J. Struct. Biol.* **193**, 1–12.
- Zhao, Y., Ren, J., Harlos, K., and Stuart, D.I. (2016). Structure of glycosylated NPC1 luminal domain C reveals insights into NPC2 and Ebola virus interactions. *FEBS Lett.* **590**, 605–612.

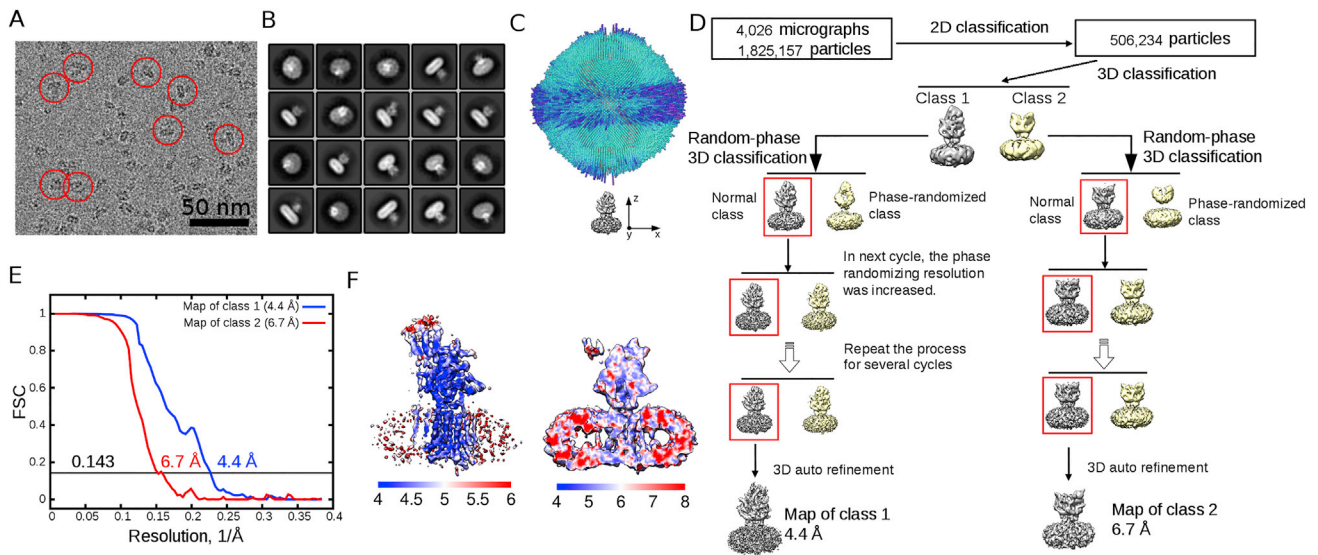

**Figure S1. Cryo-EM Analysis of NPC1, Related to Figure 1 and Experimental Procedures**

- (A) Representative micrograph. Shown here is a cut from a cryo-EM micrograph with a number of particles marked with red circles.
- (B) Representative 2D class averages. The box size is 26 nm.
- (C) Euler angle distribution of the final 3D refinement of the Class 1 map.
- (D) Flowchart of data processing. Please refer to Experimental Procedures and Table S1 for details.
- (E) Gold standard Fourier shell correlation (FSC) curves of Class 1 (blue) and Class 2 (red) maps.
- (F) Resolution maps of class 1 (left) and class 2 (right) reconstructions calculated with ResMap.

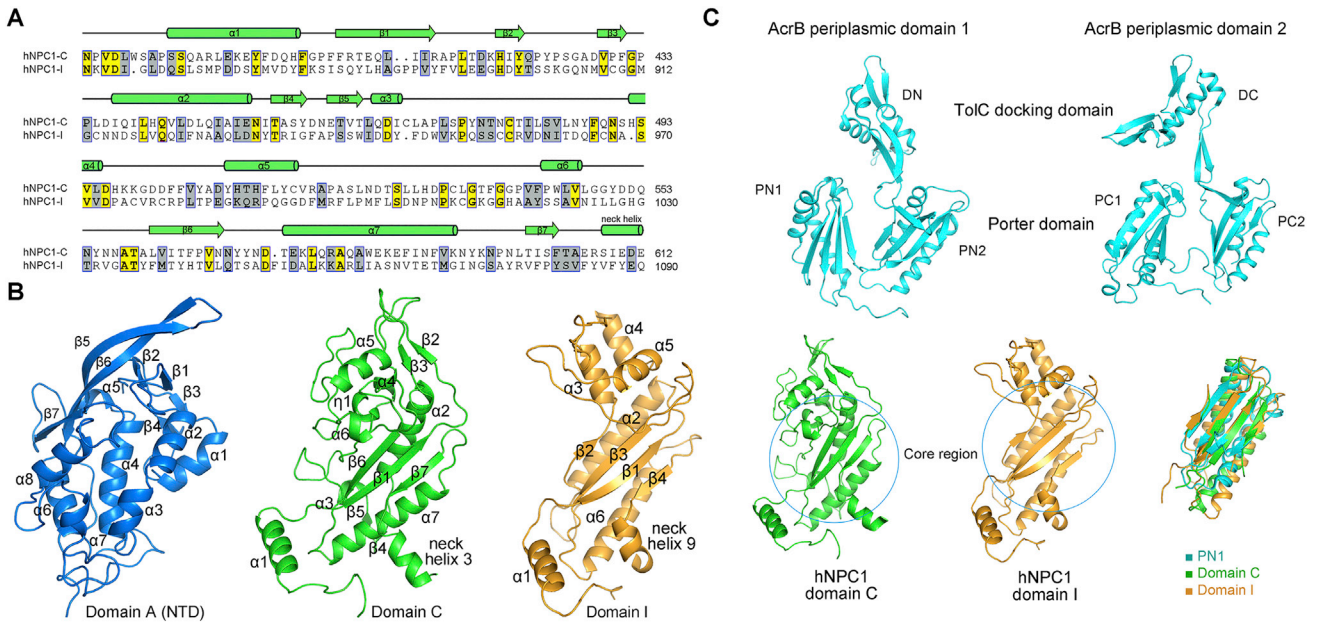

**Figure S2. Structures of the Individual Luminal Domains, Related to Figures 1 and 3**

(A) Domains C and I of hNPC1 share sequence similarity. The secondary structural elements of domain C is shown on top of the aligned sequences. Invariant and conserved residues are shaded yellow and gray, respectively.

(B) Crystal structures of the NTD and domain C (PDB: 3GKJ and PDB: 5HNS, respectively) were used for rigid body docking into the EM map with manual adjustment. A homologous model of domain I was generated based on domain C.

(C) Structural similarity of domains C and I with the periplasmic porter domains of AcrB. The core regions of domains C and I composed of the  $\beta$  sheet and two helices can be superimposed to the porter domains of AcrB.

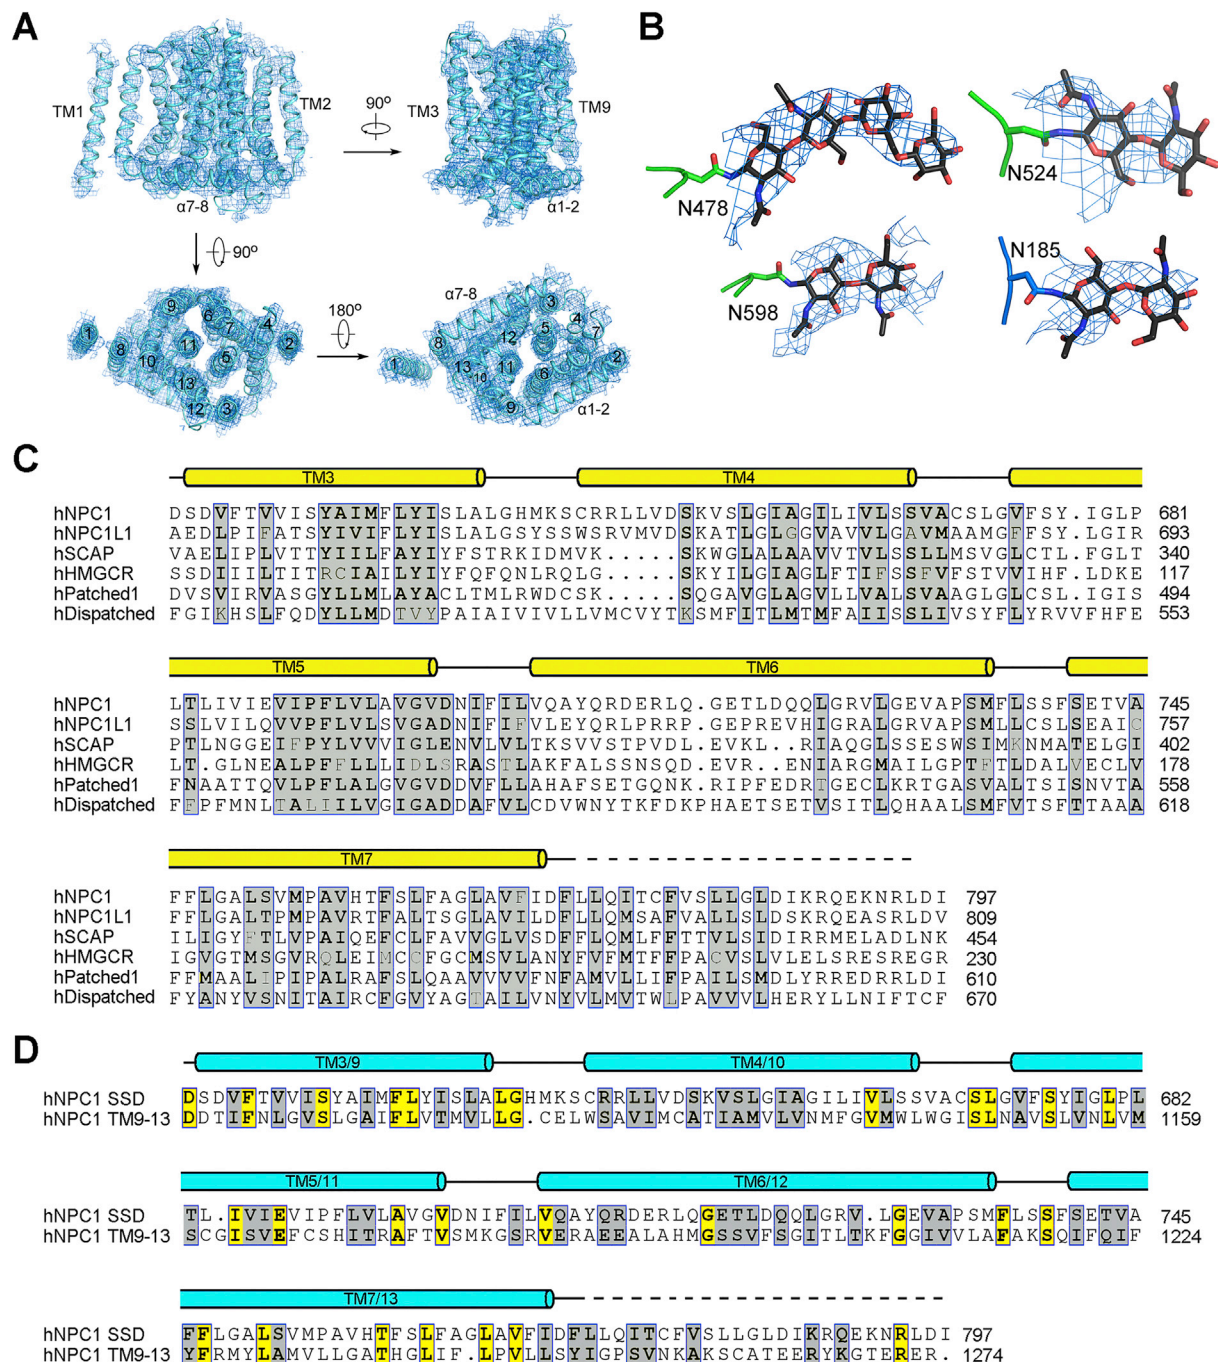

**Figure S3. TM3–7 Constitute the Sterol-Sending Domain, Related to Figure 2**

(A) The EM map for the transmembrane domain of hNPC1.

(B) Representative densities of glycosylation sites in NTD and domain C. The maps were generated in PyMol and contoured at 5 $\sigma$ .

(C) Sequence comparison of the SSDs from human proteins involved in cholesterol metabolism or signaling. The UniProt ID numbers for the aligned human sequences are: hNPC1: “UniProt: O15118”; hNPC1L1: “UniProt: Q9UHC9”; hSCAP (SREBP cleavage activating protein): “UniProt: Q12770”; hHMGR (3-hydroxy-3-methylglutaryl-CoA reductase): “UniProt: P04035”; hPatched1: “UniProt: Q13635”; hDispatched1: “UniProt: Q96F81”.

(D) TMs 9–13 of hNPC1 share sequence similarity with SSD. Shown here is the sequence comparison of SSD to the corresponding segments (TMs 9–13) in the second repeat of hNPC1. Invariant and conserved residues are shaded yellow and gray, respectively. Due to moderate resolution of the TMD, the boundaries of TM segments shown above the sequences may not be accurate.



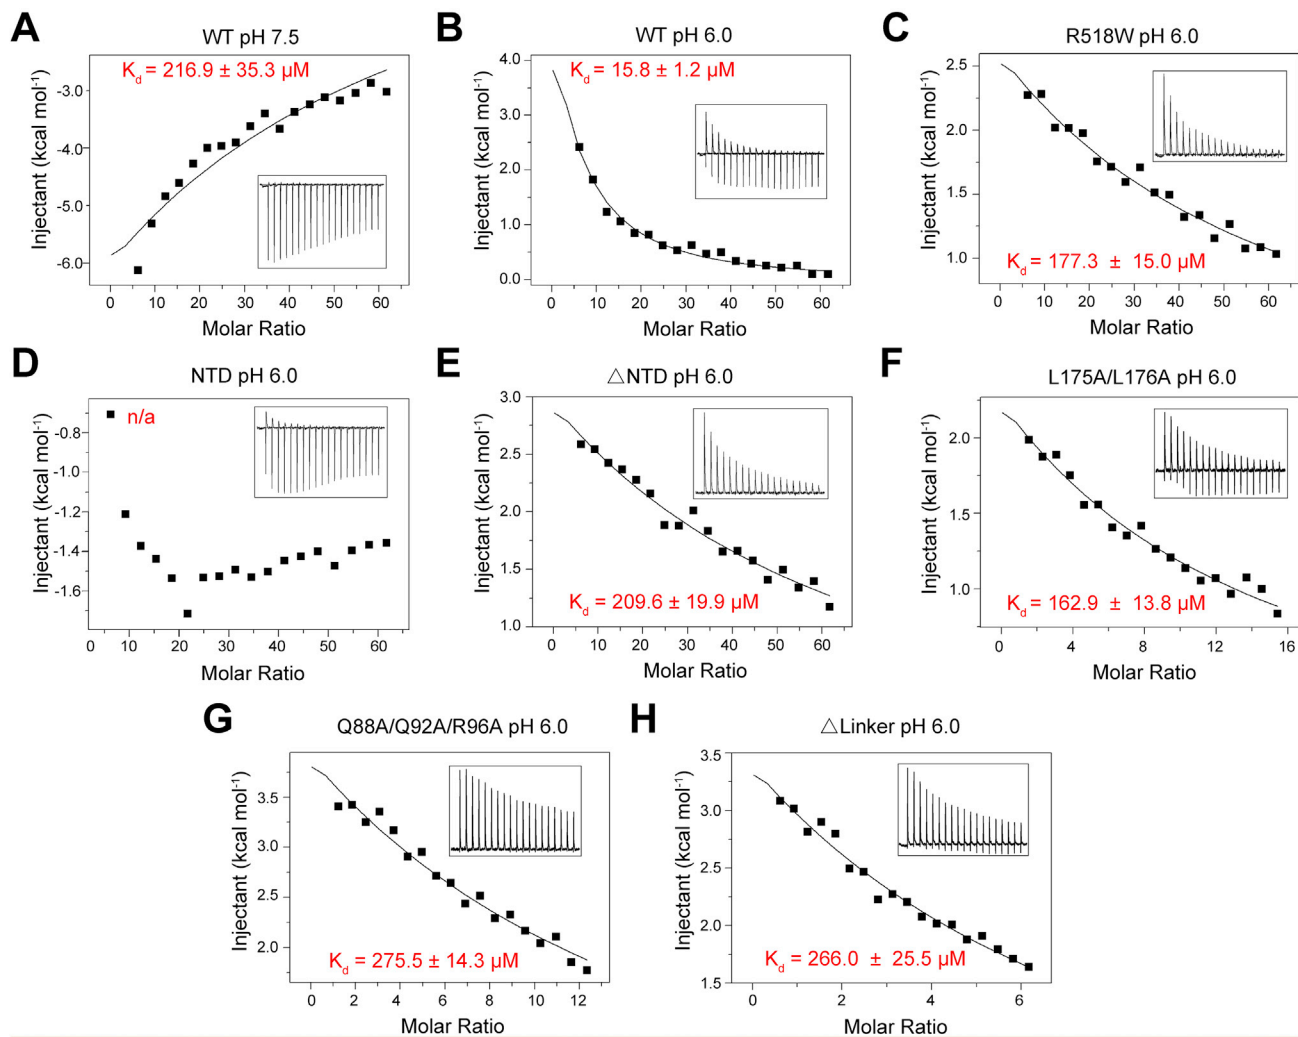

**Figure S4. Measurement of the Binding Affinity between Human NPC2 (hNPC2) and hNPC1 Variants, Related to Table 1**

Please refer to Supplemental Experimental Procedures for details of experiments and data fitting. A summary of the binding affinity is shown in Table 1.

(A and B) Measurement of the affinity between WT hNPC1 and hNPC2 at pH 7.5 (A) and pH 6.0 (B).

(C–H) Measurement of the binding affinity between hNPC2 and the indicated hNPC1 variants. All the measurements were conducted at pH 6.0. NTD: residues 1–252;  $\Delta$ NTD: FL deletion of residues 25–257 from FL protein;  $\Delta$ Linker: internal deletion of the Pro-rich segments  $_{249}$ PKPQPPPPPP $_{257}$ .

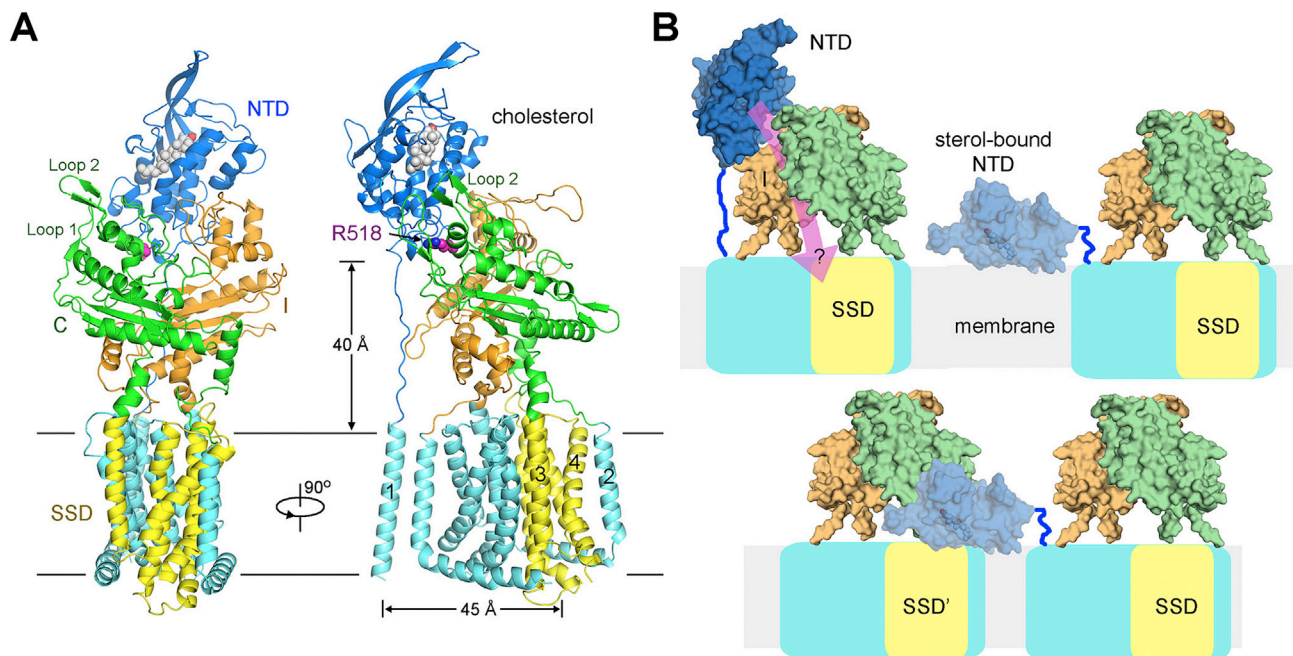

**Figure S5. Structure-Invoked Questions on the Sterol Transfer from NPC1(NTD) to Membrane, Related to Figure 4**

(A) The NTD may not be able to reach SSD in the same molecule when it bends toward the membrane. A cholesterol molecule is modeled into the pocket of NTD based on the crystal structure of cholesterol-bound hNPC1(NTD) (PDB: 3GKI). Arg518 is shown as magenta spheres. The SSD is colored yellow. It is noteworthy that the NTD is on the opposite side of SSD in the structure. The distance between TM1 and the closest TM in SSD is  $> 45 \text{ \AA}$  while the linker between NTD and TM1 is about  $40 \text{ \AA}$ . Furthermore, the relative stability of domains C and I with their respective anchoring TMD repeats may represent a spatial block to impede the placement of NTD to the proximity of SSD in the same protein molecule for direct delivery of the NTD-bound cholesterol to SSD.

(B) The molecular mechanism of cholesterol transfer from NPC1(NTD) to the membrane or SSD remains enigmatic. Shown here are speculative models. The pink arrow in the left panel of the upper row indicates the question of whether cholesterol can go from NTD through domains C and I to SSD if NPC1 functions like a RND transporter. Alternatively, NTD may directly deliver the bound cholesterol to membrane (upper right) or to the SSD of an adjacent NPC1 protein (lower row). However, the upper model cannot explain the loss of binding to cholesterol analog due to mutations in SSD unless SSD functions in later steps in cholesterol egress. The “transfer *in trans*” model in the bottom row is completely hypothetical especially when there is no evidence to support oligomerization of NPC1. The mechanism of cholesterol egress awaits further investigations.

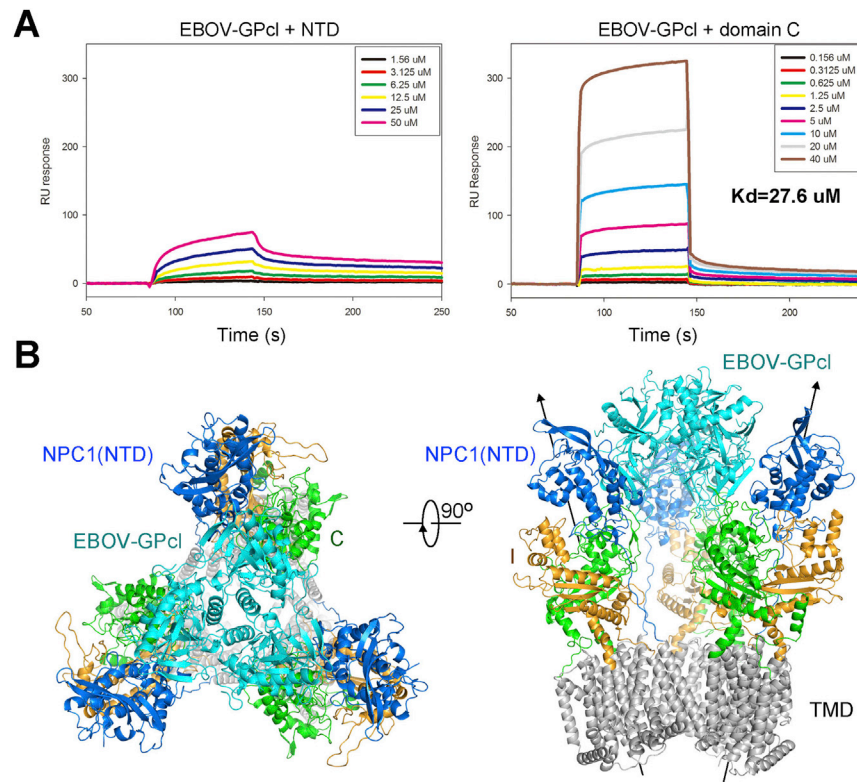

**Figure S6. Examination of the Interactions between hNPC1 and the Cleaved Glycoprotein of Ebola Virus (EBOV-GPcl), Related to Figure 5**  
 (A) There is very weak, if any, binding between isolated hNPC1(NTD) and EBOV-GPcl. The binding affinity was measure by SPR. Please refer to Supplemental Experimental Procedures for details.

(B) Modeling of the EBOV-GPcl trimer bound to three hNPC1. When three FL hNPC1 molecules are docked to the structure of trimeric EBOV-GPcl in complex with three domain C as rigid body (PDB: 5F1B), the TMD of the three hNPC1 protomers are out of the same plane. TM1 in each protomer collides with TM3 in the adjacent one.

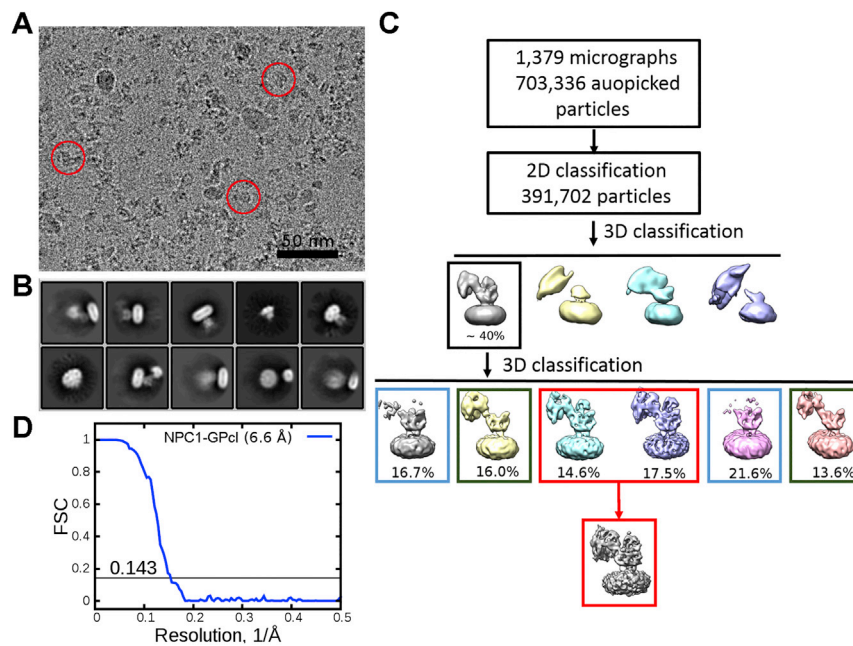

**Figure S7. Cryo-EM Analysis of the Complex between FL hNPC1 and EBOV-GPcl, Related to Figure 6**

(A) Representative micrograph. Shown here is a cut from a cryo-EM micrograph with three particles marked with red circles.

(B) Representative 2D class averages. The box size is 33.45 nm.

(C) A brief flowchart of data processing.

(D) Gold standard Fourier shell correlation (FSC) curve of the reconstruction of the NPC1-GPcl complex.

**Cell, Volume 165**

## **Supplemental Information**

### **Structural Insights into the Niemann-Pick**

#### **C1 (NPC1)-Mediated Cholesterol**

#### **Transfer and Ebola Infection**

**Xin Gong, Hongwu Qian, Xinhui Zhou, Jianping Wu, Tao Wan, Pingping Cao, Weiyun Huang, Xin Zhao, Xudong Wang, Peiyi Wang, Yi Shi, George F. Gao, Qiang Zhou, and Nieng Yan**

## **Supplemental Experimental Procedures**

### **Expression and purification of the human NPC1 (hNPC1) and NPC2 (hNPC2)**

The complementary DNAs of full-length hNPC1 and hNPC2 were each subcloned into the pCAG vector. A C-terminal His<sub>10</sub> tag was fused for hNPC1 and a C-terminal FLAG plus His<sub>10</sub> tag (for ITC) or FLAG tag (for transfer assay) was used for hNPC2. HEK 293F cells (Invitrogen) were cultured in SMM 293T-I medium (Sino Biological Inc.) at 37 °C under 5% CO<sub>2</sub> in a Multitron-Pro shaker (Infors, 130 rpm). When the cell density reached 2.0×10<sup>6</sup> cells per ml, the cells were transiently transfected with the expression plasmids and polyethylenimines (PEIs) (Polysciences). Approximately 1 mg plasmids were pre-mixed with 3 mg PEIs in 50 ml fresh medium for 15-30 min before transfection. For transfection, 50 ml mixture was added to one liter cell culture and incubated for 30 min. Transfected cells were cultured for 48 h before harvesting.

For purification of hNPC1, the cells were collected and resuspended in the buffer containing 25 mM Tris pH 8.0, 150 mM NaCl and protease inhibitor cocktails (Amresco). After sonication on ice, the membrane fraction was solubilized at 4 °C for 2 hours with 1% (w/v) digitonin (Sigma). After centrifugation at 25,000 g for 45 min, the supernatant was collected and incubated with nickel affinity resin (Ni-NTA, Qiagen) at 4 °C for 30 min. The resin was rinsed with the wash buffer containing 25 mM Tris pH 8.0, 150 mM NaCl, 30 mM imidazole, 0.1% digitonin (w/v), and protease inhibitors. The protein was eluted from the affinity resin with the wash buffer plus 250 mM imidazole. The eluent was concentrated and applied to size exclusion chromatography (SEC, Superose 6, 10/300, GE Healthcare) in the buffer containing 25 mM Tris pH 8.0, 150 mM NaCl and 0.1% digitonin. The peak fractions were pooled and concentrated for EM analysis. The hNPC1

WT and variant proteins used for ITC or SPR were purified similarly, except that digitonin were replaced by 1% LMNG (w/v) or 0.02% C12E8 (w/v) in the extraction and purification procedure, respectively.

For purification of hNPC2, the secreted protein were collected and concentrated in the buffer containing 25 mM MES pH 6.0 and 150 mM NaCl. After centrifugation at 25,000 g for 10 min, the supernatant was collected and loaded to nickel affinity resin (Ni-NTA, Qiagen) at 4 °C. The resin was washed by the buffer containing 25 mM MES pH 6.0, 150 mM NaCl and 30 mM imidazole. The protein was eluted from the affinity resin with the wash buffer plus 250 mM imidazole. The eluent was concentrated and applied to SEC (Superose 6, 10/300, GE Healthcare) in the buffer containing 25 mM MES pH 6.0, 150 mM NaCl, 0.02% C12E8 (w/v) and 0.1 mM *tris*(2-carboxyethyl)phosphine (TCEP). The peak fractions were pooled and concentrated for ITC titration. The hNPC2 protein used for cholesterol transfer assay was purified similarly, except that the SEC buffer contained 25 mM MES pH 5.5, and 150 mM NaCl.

The protocol for expression, purification and processing of the glycoprotein of Ebola virus (EBOV-GPcl) was identical to that reported (Wang et al., 2016).

### **Isothermal titration calorimetry (ITC)**

The binding affinities between hNPC2 and the indicated hNPC1 variants were measured using ITC. All the proteins were purified to homogeneity in the buffer containing 25 mM MES (pH 6.0) or 25 mM HEPES (pH 7.5), 150 mM NaCl, 0.02% C<sub>12</sub>E<sub>8</sub> (w/v) and 0.1 mM TCEP. For each injection, 2 µl hNPC2 with a concentration of approximately 300 µM was titrated into hNPC1 in the chamber. Various concentrations of the hNPC1

variants were tested and the optimal concentrations were used: WT, R518W, and  $\Delta$ NTD at  $\sim 1 \mu\text{M}$ , L175A/L176A and Q88A/Q92A/R96A at  $\sim 5 \mu\text{M}$ , and  $\Delta$ linker at  $\sim 10 \mu\text{M}$ .

Multiple concentrations of NTD were tested, but none gave rise to a characteristic pattern that could be fitted. Shown in Figure S4D was the titration with  $1 \mu\text{M}$  NTD. All experiments were performed with a VP-ITC microcalorimeter (MicroCal iTC200) at  $18^\circ\text{C}$ . The data were fitted using the software ORIGIN 7.0 (Origin Lab).

### **[ $^3\text{H}$ ]-cholesterol transfer assay**

For preparation of the [ $^3\text{H}$ ]-cholesterol bound hNPC2,  $300 \mu\text{l}$  buffer A (25 mM MES, pH 5.5, and 150 mM NaCl) containing approximately 500 nM [ $^3\text{H}$ ]-cholesterol (108.78 dpm/fmol; delivered in ethanol at final concentration of 3%) was mixed with approximately  $80 \mu\text{g}$  FLAG-tagged hNPC2. After incubation for about 3 hr at room temperature, the mixture was diluted with  $700 \mu\text{l}$  buffer A. After centrifugation at  $15000 \text{g}$  for 20 min, the suspension was applied to FLAG M2 affinity column. After washing with 4 ml cold buffer A, the [ $^3\text{H}$ ]-cholesterol-loaded protein was eluted with 1 ml cold buffer A plus 0.3 mg/ml FLAG peptide. The eluent containing [ $^3\text{H}$ ]-cholesterol-bound hNPC2 was aliquoted and used for transfer assay immediately.

For transfer assay, His<sub>10</sub>-tagged hNPC1 variants were prepared in  $125 \mu\text{l}$  buffer containing buffer A plus 0.06% digitonin and mixed with  $25 \mu\text{l}$  aforementioned hNPC2 eluent (with about 0.7 pmol [ $^3\text{H}$ ]-cholesterol as measured by scintillation counting). After incubation at  $4^\circ\text{C}$  for 30 min, each reaction was diluted with  $875 \mu\text{l}$  cold buffer B (250 mM HEPES 7.5, 150 mM NaCl and 0.06% digitonin) before immediately loading to Ni-NTA column. After washing with 3 ml cold buffer C (25 mM HEPES 7.5, 150 mM



NaCl and 0.06% digitonin), the protein was eluted with 1 ml buffer C plus 250 mM imidazole. The amount of [<sup>3</sup>H]-cholesterol in the eluent was quantified by scintillation counting. The transfer assay at pH 7.5 was carried out similarly expect that the pH of buffer A was adjusted to 7.5 with 100 mM HEPES. Each data point is the average of triple assays. Error bars represent SD.

### **Surface plasmon resonance (SPR)**

The SPR experiments were performed using a Biacore<sup>®</sup> 3000 system at 25 °C with a flow rate of 30 µl/min in buffer A (50 mM MES, pH 6.0, 150 mM NaCl, 0.02% C12E8) or buffer B (10 mM Hepes, pH 7.5, 150 mM NaCl, 0.02% C12E8). The purified proteins for SPR analysis were changed into buffer A or buffer B through SEC. For SPR measurement at pH 6.0, GPcl was covalently coupled to a CM5 sensor chip with about 2000 response units, and a series of concentrations of the hNPC1 variants were flowed over the GPcl chip surface. For measurement at pH 7.5, NPC1 was covalently coupled to a CM5 sensor chip, and different concentrations of GPcl were flowed over the NPC1 chip surface. The binding kinetics was analyzed using the software BIAevaluation Version 4.1.

### **Cryo-EM data collection and processing of the complex between FL hNPC1 and EBOV-GPcl (the NPC1-GPcl complex)**

The NPC1-GPcl complex (approximately 15 mg/ml) was reconstituted by incubating the purified NPC1 and GPcl at a mass ratio of approximately 0.6:1 at 4 °C for 5h. The procedure for cryo-EM sample preparation and data collection of the NPC1-GPcl

complex was nearly identical to that for NPC1. To be brief, a total of 1,379 micrographs of NPC1-GPcl complex were collected, from which 703,336 particles were automatically picked with RELION 1.4. After several rounds of 2D classification, a total of 391,702 particles were selected and 3D classified into 4 classes. One class that showed distinct features of the NPC1-GPcl complex was further 3D classified into 6 classes. Classes displaying similar features were combined, resulting in 3 classes based on the density of GPcl and hNPC1(NTD). The first and second classes have both NPC1 and GPcl, which were invisible at higher threshold in the third class. Among the first two classes, the NTD was invisible at a higher threshold in the second class. The first class was further subjected to 3D auto-refinement with RELION 1.4. The final particle number used was 50,223.

### **Model building and refinement**

Please refer to Experimental Procedures for cryo-EM data acquisition and processing of hNPC1. The Class 1 map of hNPC1 at 4.4 Å was used for model building. The crystal structures of domain C (PDB: 5F1B, 5HNS) (Wang et al., 2016; Zhao et al., 2016) and NPC1(NTD) (PDB: 3GKI) (Kwon et al., 2009) were first docked into the corresponding map in Chimera (Pettersen et al., 2004). Thirteen transmembrane helices (TMs) were readily discernible in the transmembrane region, 12 of which can be fitted by a homologous crystal structure of AcrB (PDB: 1IWG) (Murakami et al., 2002). Since the 12 TMs exhibited a 2-fold pseudosymmetry, the AcrB crystal structure can be fitted into the transmembrane regions in two ways. The correct fitting was selected based on the connections between TMs and the extracellular domains. The remaining transmembrane

helix was TM1. Each TM was manually adjusted in COOT (Emsley et al., 2010) to better fit the EM map. After the assignment of NTD, domain C, and TMD, the remaining map in the extracellular region corresponded to domain I. The map of domain I resembles that of domain C, consistent with their 30% sequence similarity. The structure of domain I was manually built in COOT using domain C as a reference.

Since the overall resolution was insufficient for side chain assignment, the model was mostly built as poly Ala except for the directly docked NTD and domain C. Most of the predicted glycosylation sites can be observed in the EM maps of extracellular domains and 25 sugar molecules were built to 14 glycosylation sites. These glycosyl groups facilitated validation of model building. The structure was refined against the Class 1 map by PHENIX (Adams et al., 2010) in real space with secondary structure and geometry restraints.

For the NPC1-GPcl complex, the 4.4 Å cryo-EM structure of NPC1 and the crystal structure of an EBOV-GPcl trimer (PDB: 5F1B) were fitted into the EM map in Chimera. Model statistics can be found in Supplemental Tables 2 and 4.

**Supplemental Table 1 | Statistics of the removed and remaining NPC1 particle numbers during random-phase 3D classifications.** Related to Experimental Procedure.

| <b>NPC1 Classes</b> | <b>Datasets</b> | <b>Random-phase resolution, Å</b> | <b># of iteration</b> | <b>Binning factor</b> | <b># of remaining particles</b> | <b># of removed particles</b> |
|---------------------|-----------------|-----------------------------------|-----------------------|-----------------------|---------------------------------|-------------------------------|
| <b>Class 1</b>      | subset I        | 40                                | 33                    | 2                     | 103,751                         | 4,533                         |
|                     |                 | 30                                | 72                    | 2                     | 90,072                          | 13,679                        |
|                     |                 | 25                                | 89                    | 2                     | 81,548                          | 8,524                         |
|                     |                 | 25                                | 71                    | 1                     | 78,208                          | 3,340                         |
|                     |                 | 20 <sup>a</sup>                   | 64                    | 1                     | 70,573                          | 5,663                         |
|                     |                 | 16                                | 50                    | 1                     | 66,245                          | 4,328                         |
|                     |                 | 14                                | 42                    | 1                     | 64,188                          | 2,057                         |
|                     |                 | 12                                | 33                    | 1                     | 60,977                          | 3,211                         |
|                     |                 | 11                                | 63                    | 1                     | 57,062                          | 3,915                         |
|                     |                 | 10                                | 29                    | 1                     | 52,976                          | 4,086                         |
| <b>Class 1</b>      | subset II       | 40                                | 32                    | 2                     | 150,524                         | 11,245                        |
|                     |                 | 30                                | 31                    | 2                     | 144,778                         | 5,746                         |
|                     |                 | 25                                | 33                    | 2                     | 139,447                         | 5,331                         |
|                     |                 | 20 <sup>b</sup>                   | 78                    | 2                     | 80,091                          | 20,412                        |
|                     |                 | 25                                | 63                    | 1                     | 69,108                          | 10,983                        |
|                     |                 | 20                                | 75                    | 1                     | 67,204                          | 1,904                         |
| <b>Class 1</b>      | Subsets I & II  | 25 <sup>c</sup>                   | 77                    | 1                     | 114,403                         | 5,777                         |
|                     |                 | 20                                | 98                    | 1                     | 109,947                         | 4,456                         |
|                     |                 | 15                                | 53                    | 1                     | 102,731                         | 7,216                         |
| <b>Class 2</b>      | subset I        | 40                                | 33                    | 2                     | 119,504                         | 7,435                         |
|                     |                 | 30                                | 62                    | 2                     | 105,057                         | 14,447                        |
|                     |                 | 25                                | 91                    | 2                     | 93,620                          | 11,437                        |

<sup>a</sup>, The particles were re-3D classified before this cycle; <sup>b</sup>, A total of 38,944 particles were removed through 2D classification before this cycle; <sup>c</sup>, The dataset was obtained by combining the subsets I and II.

**Supplemental Table 2 | Summary of data collection and model statistics of EM reconstructions of hNPC1.** Related to Figure 1.

| <b>Data collection</b>                          |                   |         |
|-------------------------------------------------|-------------------|---------|
| EM equipment                                    | FEI Titan Krios   |         |
| Voltage (kV)                                    | 300               |         |
| Detector                                        | K2 Summit (Gatan) |         |
| Pixel size (Å)                                  | 1.307             |         |
| Electron dose (e <sup>-</sup> /Å <sup>2</sup> ) | 50                |         |
| Defocus range (µm)                              | 1.5-3.0           |         |
| <b>Reconstruction</b>                           |                   |         |
| Software                                        | RELION 1.4        |         |
| Maps                                            | Class 1           | Class 2 |
| Number of used Particles                        | 102,731           | 93,620  |
| Symmetry                                        | C1                |         |
| Final Resolution (Å)                            | 4.4               | 6.7     |
| <b>Model building</b>                           |                   |         |
| Software                                        | COOT              |         |
| <b>Refinement</b>                               |                   |         |
| Software                                        | Phenix            |         |
| <b>Docking correlation coefficient</b>          |                   |         |
| Domain A                                        | 0.863             |         |
| Domain C                                        | 0.828             |         |
| AcrB_TMD                                        | 0.745             |         |
| NPC1_TMD                                        | 0.884             |         |
| Domain I                                        | 0.850             |         |
| <b>Model composition</b>                        |                   |         |
| Protein residues                                | 1,139             |         |
| Sugar                                           | 25                |         |
| <b>Validation</b>                               |                   |         |
| R.m.s deviations                                |                   |         |
| Bonds length (Å)                                | 0.005             |         |
| Bonds Angle (°)                                 | 0.802             |         |
| Ramachandran plot statistics (%)                |                   |         |
| Preferred                                       | 90.6              |         |
| Allowed                                         | 7.5               |         |
| Outlier                                         | 1.9               |         |

**Supplemental Table 3 | Summary of Niemann-Pick disease type C-related sequence variations of hNPC1.** Related to Figure 3.

| NTD   | Domain C | Domain I |                | TMD   |        |
|-------|----------|----------|----------------|-------|--------|
| C63R  | V378A    | Q862L    | NITDQF961-966S | M272R | Y825C  |
| C74Y  | L380F    | S865L    | N961S          | W273S | S849I  |
| Q92R  | A388P    | Y871C    | N968S          | R372W | I1094T |
| C113R | R389C    | D874V    | C976R          | M631R | D1097N |
| T137M | P401T    | P888S    | R978C          | G640R | N1137I |
| P166S | R404P    | V889M    | G986S          | S652W | G1140V |
| C177G | R404Q    | Y890C    | G992A          | G660S | M1142T |
| C177Y | R404W    | Y899D    | G992R          | V664M | N1150K |
| N222S | P433L    | G910S    | G992W          | S666N | N1156I |
| V231G | P434L    | D917Y    | M996R          | C670W | N1156S |
| P237S | E451K    | A926T    | S1004L         | G673V | V1165M |
| D242H | S473P    | A927V    | P1007A         | L684F | F1167L |
| D242N | P474L    | Q928P    | G1012D         | P691L | C1168Y |
| C247Y | C479Y    | L929P    | G1015V         | L695V | A1174V |
| G248V | Y509S    | R934Q    | H1016R         | D700N | R1186H |
|       | H510P    | S940L    | V1023G         | F703S | E1189G |
|       | H512R    | W942C    | G1034R         | L724P | T1205K |
|       | R518Q    | I943M    | A1035V         | V727F | T1205R |
|       | R518W    | D944N    | T1036K         | S734I | V1212L |
|       | A521S    | D945N    | T1036M         | E742K | L1213F |
|       | F537L    | D948H    | A1054T         | A745E | L1213V |
|       | P543L    | D948N    | R1059Q         | M754K | A1216V |
|       | T574K    | D948Y    | I1061T         | F763L | F1224L |
|       | K576R    | V950M    | A1062V         | A767V | G1236E |
|       | A605V    | S954L    | T1066N         | Q775P | G1240R |
|       | E612D    | C956Y    | F1087L         | R789C | S1249G |
|       | R615C    | R958L    | Y1088C         | R789G |        |
|       | R615L    | R958Q    | E1089K         |       |        |
|       |          | V959E    |                |       |        |

The mutations were extracted from a review (Scott and Ioannou, 2004) and the UNIPROT website: <http://www.uniprot.org/uniprot/O15118>

**Supplemental Table 4 | Summary of data collection and model statistics for the cryo-EM reconstruction of the complex between hNPC1 and EBOV-GPcl. Related to Figure 6.**

---

|                                                 |                   |
|-------------------------------------------------|-------------------|
| <b>Data collection</b>                          |                   |
| EM equipment                                    | FEI Titan Krios   |
| Voltage (kV)                                    | 300               |
| Detector                                        | K2 Summit (Gatan) |
| Pixel size (Å)                                  | 1.307             |
| Electron dose (e <sup>-</sup> /Å <sup>2</sup> ) | 50                |
| Defocus range (µm)                              | 1.7-2.7           |
| <b>Reconstruction</b>                           |                   |
| Software                                        | RELION 1.4        |
| Number of used Particles                        | 50,223            |
| Symmetry                                        | C1                |
| Final Resolution (Å)                            | 6.6               |
| <b>Model Docking</b>                            |                   |
| Software                                        | Chimera           |
| <b>Docking correlation coefficient</b>          |                   |
| GP_trimer                                       | 0.864             |
| hNPC1                                           | 0.844             |

---

**Supplemental References:**

- Adams, P.D., Afonine, P.V., Bunkoczi, G., Chen, V.B., Davis, I.W., Echols, N., Headd, J.J., Hung, L.W., Kapral, G.J., Grosse-Kunstleve, R.W., *et al.* (2010). PHENIX: a comprehensive Python-based system for macromolecular structure solution. *Acta Crystallogr D* 66, 213-221.
- Emsley, P., Lohkamp, B., Scott, W.G., and Cowtan, K. (2010). Features and development of Coot. *Acta Crystallogr D* 66, 486-501.
- Kwon, H.J., Abi-Mosleh, L., Wang, M.L., Deisenhofer, J., Goldstein, J.L., Brown, M.S., and Infante, R.E. (2009). Structure of N-terminal domain of NPC1 reveals distinct subdomains for binding and transfer of cholesterol. *Cell* 137, 1213-1224.
- Murakami, S., Nakashima, R., Yamashita, E., and Yamaguchi, A. (2002). Crystal structure of bacterial multidrug efflux transporter AcrB. *Nature* 419, 587-593.
- Pettersen, E.F., Goddard, T.D., Huang, C.C., Couch, G.S., Greenblatt, D.M., Meng, E.C., and Ferrin, T.E. (2004). UCSF chimera - A visualization system for exploratory research and analysis. *J Comput Chem* 25, 1605-1612.
- Scott, C., and Ioannou, Y.A. (2004). The NPC1 protein: structure implies function. *Biochimica et Biophysica Acta (BBA) - Molecular and Cell Biology of Lipids* 1685, 8-13.
- Wang, H., Shi, Y., Song, J., Qi, J.X., Lu, G.W., Yan, J.H., and Gao, G.F. (2016). Ebola Viral Glycoprotein Bound to Its Endosomal Receptor Niemann-Pick C1. *Cell* 164, 258-268.
- Zhao, Y., Ren, J., Harlos, K., and Stuart, D.I. (2016). Structure of glycosylated NPC1 luminal domain C reveals insights into NPC2 and Ebola virus interactions. *FEBS letters*.
